# Supplementary material
Source: PubMed Central journal article supplement (PMC4925298)
Supplement: NIHMS783964-supplement-2.pdf [file NIHMS783964-supplement-2.pdf]

| ID            | Gene Name                                                   | FDR<br>(pre&postnatal) | FDR<br>(postnatal) |
|---------------|-------------------------------------------------------------|------------------------|--------------------|
| 2210408I21Rik | RIKEN cDNA 2210408I21 gene                                  | 8.93E-07               | 0.038155606        |
| A530032D15Rik | RIKEN cDNA A530032D15Rik gene                               | 0.038008176            | 2.09E-05           |
| Acacb         | acetyl-Coenzyme A carboxylase beta                          | 1.07E-14               | 3.43E-05           |
| Ank1          | ankyrin 1, erythroid                                        | 6.76E-08               | 0.037369502        |
| Ank3          | ankyrin 3, epithelial                                       | 0.025089193            | 0.03170677         |
| Ano2          | anoctamin 2                                                 | 5.40E-18               | 4.32E-07           |
| Apool         | apolipoprotein O-like                                       | 0.001118347            | 0.016145928        |
| Atus2         | autism susceptibility candidate 2                           | 5.36E-16               | 0.000136714        |
| C130026I21Rik | similar to SP140 nuclear body protein family member         | 0.021802715            | 0.000372029        |
| Cdk5rap2      | CDK5 regulatory subunit associated protein 2                | 1.78E-07               | 0.047926553        |
| Chd9          | chromodomain helicase DNA binding protein 9                 | 0.048521886            | 0.002718363        |
| Chl1          | cell adhesion molecule with homology to L1CAM               | 4.67E-09               | 1.51E-11           |
| Cpeb1         | cytoplasmic polyadenylation element binding protein 1       | 0.042573761            | 0.040368177        |
| Csda          | cold shock domain protein A                                 | 1.06E-14               | 3.43E-05           |
| Eif4a2        | eukaryotic translation initiation factor 4A2                | 0.044916064            | 0.036176643        |
| Fbxw4         | F-box and WD-40 domain protein 4                            | 0.033310937            | 0.000184038        |
| Fgf12         | fibroblast growth factor 12                                 | 0.039388541            | 0.000184038        |
| Gpr19         | G protein-coupled receptor 19                               | 0.037900534            | 0.038098746        |
| Ing4          | inhibitor of growth family, member 4                        | 0.02856405             | 0.02847679         |
| Izumo1        | izumo sperm-egg fusion 1                                    | 3.56E-16               | 5.68E-06           |
| Kcnq1         | potassium voltage-gated channel, subfamily Q, member 1      | 1.14E-05               | 0.04566623         |
| Lage3         | L antigen family, member 3                                  | 0.029330973            | 0.003353947        |
| Lars2         | leucyl-tRNA synthetase, mitochondrial                       | 0.00103869             | 0.010982124        |
| Lipc          | lipase, hepatic                                             | 9.43E-06               | 1.17E-05           |
| Litaf         | LPS-induced TN factor                                       | 1.06E-05               | 0.015501719        |
| Mbnl1         | muscleblind-like 1 (Drosophila)                             | 0.014790903            | 0.012125092        |
| Mdga2         | MAM domain containing glycosylphosphatidylinositol anchor 2 | 3.74E-11               | 0.017296099        |
| Mef2c         | myocyte enhancer factor 2C                                  | 0.008353399            | 0.002577155        |
| Ntm           | neurotrimin                                                 | 0.011985522            | 0.044375612        |

|           |                                                                 |             |             |
|-----------|-----------------------------------------------------------------|-------------|-------------|
| Rabgap1l  | RAB GTPase activating protein 1-like                            | 0.044469567 | 0.001785805 |
| Rin2      | similar to Ras and Rab interactor 2; Ras and Rab interactor 2   | 4.61E-09    | 2.11E-08    |
| Sepsecs   | Sep (O-phosphoserine) tRNA                                      | 6.53E-07    | 0.00153469  |
| Slc35a2   | solute carrier family 35 (UDP-galactose transporter), member A2 | 0.007163381 | 0.006114679 |
| Sorbs2    | sorbin and SH3 domain containing 2                              | 0.003283078 | 0.000776979 |
| Sorcs1    | VPS10 domain receptor protein SORCS 1                           | 0.001037955 | 0.009029728 |
| Sp110     | predicted gene 15753; Sp110 nuclear body protein                | 0.003851627 | 0.001195924 |
| Syt4      | synaptotagmin IV                                                | 0.013634086 | 0.037736076 |
| Zfp658    | cDNA sequence BC043301                                          | 0.013288823 | 0.012528656 |
| Zfp71-rs1 | zinc finger protein 71, related sequence                        | 0.041686509 | 0.034138712 |

Supplementary Table 1. 39 common gene loci identified from pre & postnatal nicotine and postnatal nicotine treated group (adj.p<0.05)

| ID            | Gene Name                                                                                   | FDR<br>(pre&postnatal) | FDR<br>(postnatal) |
|---------------|---------------------------------------------------------------------------------------------|------------------------|--------------------|
| 2210408I21Rik | RIKEN cDNA 2210408I21 gene                                                                  | 8.93E-07               | 0.038155606        |
| A530032D15Rik | RIKEN cDNA A530032D15Rik gene                                                               | 0.038008176            | 2.09E-05           |
| Acacb         | acetyl-Coenzyme A carboxylase beta                                                          | 1.07E-14               | 3.43E-05           |
| Adam12        | a disintegrin and metalloproteinase domain 12 (meltrin alpha)                               | 6.76E-08               | 0.037369502        |
| Aldh1b1       | aldehyde dehydrogenase 1 family, member B1                                                  | 0.065952838            | 0.088568177        |
| Ank1          | ankyrin 1, erythrocytic                                                                     | 6.76E-08               | 0.037369502        |
| Ank3          | ankyrin 3, node of Ranvier (ankyrin G)                                                      | 0.025089193            | 0.03170677         |
| Ano2          | anoctamin 2                                                                                 | 5.40E-18               | 4.32E-07           |
| Apool         | apolipoprotein O-like                                                                       | 0.001118347            | 0.016145928        |
| Atp5g1        | ATP synthase, H <sup>+</sup> transporting, mitochondrial F0 complex, subunit C1 (subunit 9) | 0.079697042            | 0.079697042        |
| Atrnl1        | attractin-like 1                                                                            | 1.49E-05               | 0.080044326        |
| AU015836      | expressed sequence AU015836                                                                 | 0.050596023            | 0.01451473         |
| Auts2         | autism susceptibility candidate 2                                                           | 5.36E-16               | 0.000136714        |
| C130026I21Rik | RIKEN cDNA C130026I21 gene                                                                  | 0.021802715            | 0.000372029        |
| Cdc73         | Cell division control protein 73                                                            | 0.073836761            | 0.088726114        |
| Cdk5rap2      | CDK5 regulatory subunit associated protein 2                                                | 1.78E-07               | 0.047926553        |
| Chd9          | chromodomain helicase DNA binding protein 9                                                 | 0.048521886            | 0.002718363        |
| Chl1          | cell adhesion molecule with homology to L1CAM                                               | 4.67E-09               | 1.51E-11           |
| Cpeb1         | cytoplasmic polyadenylation element binding protein 1                                       | 0.042573761            | 0.040368177        |
| Csda          | cold shock domain protein A                                                                 | 1.06E-14               | 3.43E-05           |
| D6Wsu163e     | DNA segment, Chr 6, Wayne State University 163, expressed                                   | 0.071347961            | 0.04566623         |
| Dlg2          | discs, large homolog 2                                                                      | 0.057139925            | 0.049376395        |
| Eif4a2        | eukaryotic translation initiation factor 4A2                                                | 0.044916064            | 0.036176643        |
| Elavl2        | ELAV (embryonic lethal, abnormal vision)-like 2 (Hu antigen B)                              | 0.004157577            | 0.051964561        |
| Fam19a3       | family with sequence similarity 19 (chemokine (C-C motif)-like), member A3                  | 0.08058543             | 0.002718363        |
| Fastkd2       | FAST kinase domains 2                                                                       | 0.055335149            | 0.077897659        |
| Fbxw4         | F-box and WD repeat domain containing 4                                                     | 0.033310937            | 0.000184038        |
| Fgf12         | fibroblast growth factor 12                                                                 | 0.039388541            | 0.000184038        |
| Gas8          | growth arrest-specific 8                                                                    | 0.097730225            | 0.063671548        |
| Glis3         | GLIS family zinc finger 3                                                                   | 0.088618788            | 0.004125082        |
| Gm13152       | predicted gene 13152                                                                        | 0.037492077            | 0.062014274        |
| Gpr19         | G protein-coupled receptor 19                                                               | 0.037900534            | 0.038098746        |
| Hdac10        | histone deacetylase 10                                                                      | 0.075936628            | 0.061014668        |
| Ing4          | inhibitor of growth family, member 4                                                        | 0.02856405             | 0.02847679         |
| Izumo1        | izumo sperm-egg fusion 1                                                                    | 3.56E-16               | 5.68E-06           |
| Kcnq1         | potassium voltage-gated channel, KQT-like subfamily, member 1                               | 1.14E-05               | 0.04566623         |
| Lage3         | L antigen family, member 3                                                                  | 0.029330973            | 0.003353947        |
| Lars2         | leucyl-tRNA synthetase 2, mitochondrial                                                     | 0.00103869             | 0.010982124        |
| Lipc          | lipase, hepatic                                                                             | 9.43E-06               | 1.17E-05           |

|           |                                                                 |             |             |
|-----------|-----------------------------------------------------------------|-------------|-------------|
| Litaf     | lipopolysaccharide-induced TNF factor                           | 1.06E-05    | 0.015501719 |
| Lrrtm4    | leucine rich repeat transmembrane neuronal 4                    | 0.093643174 | 0.030674136 |
| MacroD2   | MACRO domain-containing protein 2                               | 0.029330973 | 0.058068612 |
| Mapk10    | mitogen-activated protein kinase 10                             | 0.0029967   | 0.08626202  |
| Mbnl1     | muscleblind-like 1 (Drosophila)                                 | 0.014790903 | 0.012125092 |
| Mdga2     | MAM domain containing glycosylphosphatidylinositol anchor 2     | 3.74E-11    | 0.017296099 |
| Mef2c     | myocyte enhancer factor 2C                                      | 0.008353399 | 0.002577155 |
| NcoA1     | nuclear receptor coactivator 1                                  | 0.058187811 | 4.76E-05    |
| Ngdn      | neuroguidin, EIF4E binding protein                              | 0.092853631 | 0.077296869 |
| Nmt1      | Glycylpeptide N-tetradecanoyltransferase                        | 0.019774984 | 0.093523028 |
| Npffr2    | neuropeptide FF receptor 2                                      | 0.013729635 | 0.097636892 |
| Ntm       | neurotrimin                                                     | 0.011985522 | 0.044375612 |
| Pank1     | pantothenate kinase 1                                           | 0.079488186 | 0.090827981 |
| Pisd-ps1  | phosphatidylserine decarboxylase, pseudogene 1                  | 0.095486187 | 0.003564612 |
| Ppil2     | peptidylprolyl isomerase (cyclophilin)-like 2                   | 0.034451154 | 0.087426372 |
| Prickle2  | prickle homolog 2 (Drosophila)                                  | 0.051082201 | 0.08177247  |
| Psd3      | pleckstrin and Sec7 domain containing 3                         | 0.093039972 | 0.062014274 |
| Rabgap1l  | RAB GTPase activating protein 1-like                            | 0.044469567 | 0.001785805 |
| Rin2      | Ras and Rab interactor 2                                        | 4.61E-09    | 2.11E-08    |
| Sepsecs   | Sep (O-phosphoserine) tRNA:Sec (selenocysteine) tRNA synthase   | 6.53E-07    | 0.00153469  |
| Sh3pxd2a  | SH3 and PX domains 2A                                           | 0.07258674  | 0.070588595 |
| Slc35a2   | solute carrier family 35 (UDP-galactose transporter), member A2 | 0.007163381 | 0.006114679 |
| Sorbs2    | sorbin and SH3 domain containing 2                              | 0.003283078 | 0.000776979 |
| Sorcs1    | sortilin-related VPS10 domain containing receptor 1             | 0.001037955 | 0.009029728 |
| Sp110     | Sp110 nuclear body protein                                      | 0.003851627 | 0.001195924 |
| Sumf2     | sulfatase modifying factor 2                                    | 0.003851627 | 0.049635918 |
| Syt4      | synaptotagmin IV                                                | 0.013634086 | 0.037736076 |
| Taz       | tafazzin                                                        | 0.09617633  | 0.003253765 |
| Wdr34     | WD repeat domain 34                                             | 0.058187811 | 0.040777754 |
| Wwc2      | WW and C2 domain containing 2                                   | 0.025783257 | 0.067486457 |
| Zfp658    | cDNA sequence BC043301                                          | 0.013288823 | 0.012528656 |
| Zfp71-rs1 | zinc finger protein 71, related sequence                        | 0.041686509 | 0.034138712 |
| Spag17-ps | sperm associated antigen 17 pseudogene                          | 0.003680777 | 0.064997816 |
| Rbfox2    | RNA binding protein, fox-1 homolog                              | 8.10E-05    | 0.086608937 |

Supplementary Table 2. 73 common gene loci identified from pre & postnatal nicotine and postnatal nicotine treated group (adj.p<0.05)

| Gene Symbol | Gene Name                                                          | Gene Ontology Group |                         |                                 |                                  |                          |                                 |
|-------------|--------------------------------------------------------------------|---------------------|-------------------------|---------------------------------|----------------------------------|--------------------------|---------------------------------|
|             |                                                                    | GO:0045202~synapse  | GO:0044456~synapse part | GO:0014069~postsynaptic density | GO:0045211~postsynaptic membrane | GO:0030054~cell junction | GO:0044459~plasma membrane part |
| Ank3        | Ankyrin 3                                                          | X                   |                         |                                 |                                  |                          |                                 |
| Caly        | Calcyon neuron-specific vesicular protein                          |                     |                         |                                 |                                  |                          | X                               |
| Camk2a      | Calcium/calmodulin-dependent protein kinase II alpha               | X                   | X                       |                                 |                                  | X                        | X                               |
| Chrm1       | Cholinergic receptor, muscarinic 1                                 | X                   | X                       |                                 | X                                | X                        | X                               |
| Cldn23      | claudin 23                                                         |                     |                         |                                 |                                  | X                        | X                               |
| Cog4        | component of oligomeric golgi complex 4                            |                     |                         |                                 |                                  |                          | X                               |
| Cpeb1       | cytoplasmic polyadenylation element binding protein 1              | X                   | X                       | X                               | X                                | X                        | X                               |
| Csda        | Cold-shock domain protein A                                        |                     |                         |                                 |                                  | X                        | X                               |
| Dlg2        | discs, large homolog 2 ( Drosophila)                               | X                   | X                       | X                               | X                                | X                        | X                               |
| Dlgap2      | discs, large ( Drosophila) homolog-associated protein 2            | X                   | X                       | X                               | X                                | X                        | X                               |
| Dnmbp       | dynamin binding protein                                            | X                   | X                       |                                 |                                  | X                        | X                               |
| Ephbp3      | EPH receptor B3                                                    |                     |                         |                                 |                                  |                          | X                               |
| Gabra1      | gamma-aminobutyric acid (GABA) A receptor, alpha 1                 | X                   | X                       |                                 | X                                | X                        | X                               |
| Gria3       | glutamate receptor, ionotropic, AMPA 3                             | X                   | X                       | X                               | X                                | X                        | X                               |
| Grin1       | glutamate receptor, ionotropic, N-methyl D-aspartate 1 (Zeta 1)    | X                   | X                       | X                               | X                                | X                        | X                               |
| Kcnq1       | potassium voltage-gated channel, KQT-like subfamily, member 1      |                     |                         |                                 |                                  |                          | X                               |
| Kctd16      | potassium channel tetramerization domain containing 16             |                     |                         |                                 |                                  |                          | X                               |
| Litaf       | lipopolysaccharide- induced TNF factor                             |                     |                         |                                 |                                  |                          | X                               |
| Lrrk2       | leucine-rich repeat kinase 2                                       | X                   | X                       |                                 |                                  |                          |                                 |
| Magi2       | membrane associated guanylate kinase, WW and PDZ domain contain    | X                   |                         |                                 |                                  | X                        | X                               |
| Npffr2      | neuropeptide FF receptor 2                                         |                     |                         |                                 |                                  |                          | X                               |
| Ppt1        | palmitoyl-protein thioesterase 1                                   | X                   | X                       |                                 |                                  |                          |                                 |
| Prickle2    | prickle homolog 2 ( Drosophila)                                    |                     |                         |                                 |                                  |                          | X                               |
| Psd3        | pleckstrin and Sec7 domain containing 3                            | X                   | X                       | X                               | X                                | X                        | X                               |
| Rab3c       | member RAS oncogene family                                         | X                   | X                       |                                 |                                  |                          | X                               |
| Rims2       | regulating synaptic membrane exocytosis 2                          | X                   |                         |                                 |                                  | X                        | X                               |
| Shroom4     | shroom family member 4                                             |                     |                         |                                 |                                  |                          | X                               |
| Slc4a10     | solute carrier family 4, sodium bicarbonate transporter, member 10 |                     |                         |                                 |                                  |                          | X                               |
| Speed2      | sprouty-related, EVH1 domain containing 2                          |                     |                         |                                 |                                  |                          | X                               |
| Syt4        | synaptotagmin IV                                                   | X                   | X                       |                                 |                                  | X                        | X                               |
| Syt12       | synaptotagmin-like 2                                               |                     |                         |                                 |                                  |                          | X                               |
| Tnfrsf1     | tumor necrosis factor, alpha-induced protein 1 (endothelial)       |                     |                         |                                 |                                  |                          | X                               |
| Vwf         | von Willebrand factor 2                                            |                     |                         |                                 |                                  |                          | X                               |
| Xirp2       | xin actin-binding repeat containing 2                              |                     |                         |                                 |                                  |                          | X                               |

Supplementary Table 3. Significant Gene Ontology Groups for H3MeK4 sequencing data of tissue from pre- and postnatal nicotine treated subjects.

| Gene Symbol | Gene Name                                                             | Gene Ontology Group |                          |                                  |                                   |                           |                                  |
|-------------|-----------------------------------------------------------------------|---------------------|--------------------------|----------------------------------|-----------------------------------|---------------------------|----------------------------------|
|             |                                                                       | GO:0045202--synapse | GO:0044456--synapse part | GO:0014069--postsynaptic density | GO:0045211--postsynaptic membrane | GO:0030054--cell junction | GO:0044459--plasma membrane part |
| Alk         | anaplastic lymphoma receptor tyrosine kinase                          |                     |                          |                                  |                                   |                           | X                                |
| Anks1b      | ankyrin repeat and sterile alpha motif domain containing 1B           | X                   | X                        | X                                | X                                 | X                         | X                                |
| Arhgef2     | ADP-ribosylation factor guanine nucleotide-exchange factor 2          | X                   |                          |                                  |                                   |                           | X                                |
| Cacnb4      | calcium channel, voltage-dependent, beta 4 subunit                    |                     |                          |                                  |                                   |                           | X                                |
| Cdh13       | cadherin 13 (T-cadherin)                                              |                     |                          |                                  |                                   |                           | X                                |
| Cdh4        | Cadherin 4                                                            |                     |                          |                                  |                                   |                           | X                                |
| Chrna3      | cholinergic receptor, nicotinic, alpha 3 (neuronal)                   | X                   | X                        | X                                | X                                 | X                         | X                                |
| Cpeb1       | cytoplasmic polyadenylation element binding protein 1                 | X                   | X                        | X                                | X                                 | X                         | X                                |
| Csda        | Cold-shock domain protein A                                           | X                   |                          |                                  |                                   |                           | X                                |
| Ctnna1      | catenin (cadherin- associated protein), alpha 1                       | X                   |                          |                                  |                                   |                           | X                                |
| Cybrd1      | cytochrome b reductase 1                                              |                     |                          |                                  |                                   |                           | X                                |
| Dlg2        | discs, large homolog 2 ( Drosophila)                                  | X                   | X                        | X                                | X                                 | X                         | X                                |
| Dsc1        | desmocollin 1                                                         | X                   |                          |                                  |                                   |                           | X                                |
| Fblim1      | filamin binding LIM protein 1                                         | X                   |                          |                                  |                                   |                           | X                                |
| Fmn1        | formin 1                                                              | X                   |                          |                                  |                                   |                           | X                                |
| Fn1         | fibronectin 1                                                         |                     |                          |                                  |                                   |                           | X                                |
| Grid2ip     | glutamate receptor, ionotropic, delta 2 (Grid2) interacting protein   | X                   | X                        | X                                | X                                 | X                         | X                                |
| Grin2c      | glutamate receptor, ionotropic, N-methyl D-aspartate 2C               | X                   | X                        | X                                | X                                 | X                         | X                                |
| Grin2d      | glutamate receptor, ionotropic, N-methyl D-aspartate 2D,              | X                   | X                        | X                                | X                                 | X                         | X                                |
| Grip1       | glutamate receptor interacting protein 1                              | X                   | X                        |                                  | X                                 | X                         | X                                |
| Kcnc1       | potassium voltage-gated channel, KQT-like subfamily, member 1         |                     |                          |                                  |                                   |                           | X                                |
| Lmo7        | LIM domain only 7                                                     |                     |                          |                                  |                                   |                           | X                                |
| Magi1       | membrane associated guanylate kinase, WW and PDZ domain containing 1  |                     |                          |                                  |                                   |                           | X                                |
| Mmp16       | matrix metalloproteinase 16 (membrane-inserted)                       |                     |                          |                                  |                                   |                           | X                                |
| Mt3         | metallothionein 3                                                     | X                   | X                        | X                                | X                                 | X                         | X                                |
| Npffr2      | neuropeptide FF receptor 2                                            | X                   |                          |                                  |                                   |                           | X                                |
| Odz3        | Oz/ten-m homolog 3 (Drosophila)                                       | X                   |                          |                                  |                                   | X                         | X                                |
| Prickle2    | prickle homolog 2 ( Drosophila)                                       | X                   |                          |                                  |                                   |                           | X                                |
| Psd3        | pleckstrin and Sec7 domain containing 3                               | X                   | X                        | X                                | X                                 | X                         | X                                |
| Pvrl4       | poliovirus receptor-related 4                                         | X                   |                          |                                  |                                   |                           | X                                |
| Rimbp2      | Rims binding protein 2                                                | X                   |                          |                                  |                                   | X                         | X                                |
| Scn1a       | sodium channel, voltage -gated, type I, alpha subunit                 | X                   |                          |                                  |                                   |                           | X                                |
| Shank2      | SH3 and multiple ankyrin repeat domains 2                             | X                   | X                        | X                                | X                                 | X                         | X                                |
| Slc2a3      | solute carrier family 2 (facilitated glucose transporter), member 3   |                     |                          |                                  |                                   |                           | X                                |
| Slc4a4      | solute carrier family 4 ( sodium bicarbonate cotransporter), member 4 |                     |                          |                                  |                                   |                           | X                                |
| Sorbs3      | sorbin and SH3 domain containing 3                                    | X                   |                          |                                  |                                   |                           | X                                |
| Spred2      | sprouty-related, EVH1 domain containing 2                             |                     |                          |                                  |                                   |                           | X                                |
| Syt4        | synaptotagmin IV                                                      | X                   |                          |                                  | X                                 | X                         | X                                |
| Utrn        | Utrophin                                                              | X                   |                          |                                  |                                   | X                         | X                                |
| Vmn1r81     | vomer nasal 1 receptor 81                                             |                     |                          |                                  |                                   |                           | X                                |

Supplementary Table 4. Significant Gene Ontology Groups for H3MeK4 sequencing data of tissue from postnatal-only nicotine treated subjects.

ChIP-PCR primers (H3K4me3)

| Target    | Forward                     | Reverse                    |
|-----------|-----------------------------|----------------------------|
| Acacb     | 5'-ggaagtgactcatgcctgt-3'   | 5'-gagcagtcgggtgctcttac-3' |
| Ank1      | 5'-ctcgtggccattttcctaa-3'   | 5'-cccgtgcagtaagttctc-3'   |
| Ank3      | 5'-cctcagtgattctgggaga-3'   | 5'-aacactggggcagaacatc-3'  |
| Ano2      | 5'-ccagtggcttccgattgtat-3'  | 5'-gaatggaatggagcaggcta-3' |
| Apool     | 5'-ttaatccctgctgggtaactg-3' | 5'-ttttgtctgtttgccaca-3'   |
| Auts2     | 5'-ccaagtgagcctctggtt-3'    | 5'-gatcctaaacggcagcagag-3' |
| Cdk5rap2  | 5'-ataggccgaggtgcagtaga-3'  | 5'-ccacccattgttacctgtc-3'  |
| Chd9      | 5'-gaacaaatgtacgccctcgt-3'  | 5'-atgacatcaacctgccttc-3'  |
| Chl1      | 5'-ccttgctgaaagattgctg-3'   | 5'-cctgaattgttagccgcaat-3' |
| Cpeb1     | 5'-gcttgatacctgcctctg-3'    | 5'-cagaggtgggaaaagcat-3'   |
| Csda      | 5'-tccagattgtgcaggtga-3'    | 5'-tagccctccttaggccttc-3'  |
| Eif4a2    | 5'-gactccagatgtggggaga-3'   | 5'-cccctctcgacagaacccta-3' |
| Fbxw4     | 5'-taactcggagccatctct-3'    | 5'-cggcctcactcactagaag-3'  |
| Fgf12     | 5'-tcacacgtttgtgacct-3'     | 5'-gatcaaggagctggctatcg-3' |
| Gpr19     | 5'-agcacgagagggaaagaa-3'    | 5'-tgcttgctgctgtgtatc-3'   |
| Ing4      | 5'-ctcgtgtagatgaccgtga-3'   | 5'-aatacatcccagcagccatc-3' |
| Izumo1    | 5'-acgtggaagtcctgaccatc-3'  | 5'-cctgtctgggctagcatttc-3' |
| Kcnq1     | 5'-cccactttctctcagcctg-3'   | 5'-aaaacgggcaagagagttga-3' |
| Lage3     | 5'-aatccctggagagtcctct-3'   | 5'-tgctgtcctccttcaacc-3'   |
| Lars2     | 5'-gctgtacctgtgcaaacct-3'   | 5'-agcagctcatgcctagctc-3'  |
| Lipc      | 5'-agaggccggaggattactgt-3'  | 5'-cttgagcccagaagtccaag-3' |
| Litaf     | 5'-gcagatgctgggtatcggtt-3'  | 5'-agatggctctgctggctgt-3'  |
| Mbnl1     | 5'-acaaactccatcgaaatc-3'    | 5'-tcagccgtgtgctcagtaac-3' |
| Mdga2     | 5'-attacgagggtgggaagt-3'    | 5'-aaaatgccagcacagaaacc-3' |
| Mef2c     | 5'-acacacgcacacttcgtctc-3'  | 5'-gcctgaagtgcttctccac-3'  |
| Rabgap1l  | 5'-ctgccgggagattcttaca-3'   | 5'-aggaggaccgagtcacctt-3'  |
| Rin2      | 5'-ccatgatattccaccaagg-3'   | 5'-tctttccctggggttctt-3'   |
| Sepsecs   | 5'-tgggactattcaggccaac-3'   | 5'-gctgatttggagcctgag-3'   |
| Slc35a    | 5'-ggagcaacggaaccaataaa-3'  | 5'-atttcaaatgggtggcttcg-3' |
| Sorbs2    | 5'-gcggttatccaactgcatct-3'  | 5'-ttcctcctgaaaacgtcac-3'  |
| Sorcs1    | 5'-attaaacgcgtcaagcacct-3'  | 5'-cgtgtcttcagcttctcc-3'   |
| Sp110     | 5'-ttgcttggtcctctcactct-3'  | 5'-gtatcaccgcaggatgtgtg-3' |
| Syt4      | 5'-tgctttggcctcgtctca-3'    | 5'-gcggtttaccctcactcac-3'  |
| Zfp658    | 5'-ggccatgacagctcctaaa-3'   | 5'-atatgaccgctcgagaccac-3' |
| Zfp71-rs1 | 5'-ccgaactccttggtgtgtt-3'   | 5'-atccaaaccaagacactcg-3'  |

ChIP-PCR primers (Control GAPDH H3K4me3)

| Target    | Forward                   | Reverse                   |
|-----------|---------------------------|---------------------------|
| Gapdh (1) | 5'-ccctgaactaaggggaaag-3' | 5'-ttcatcctccagaaaccag-3' |
| Gapdh (2) | 5'-acatcaccccatcactcat-3' | 5'-tccccttagttcgaggact-3' |

ChIP-PCR primers (Acetylation)

| Target | Forward                     | Reverse                       |
|--------|-----------------------------|-------------------------------|
| Mef2c  | 5'-cacgcatctcaccgcttgacg-3' | 5'-caccagtgcccttctgcttctcc-3' |

qRT-PCR primer list

| Target  | Forward                       | Reverse                       |
|---------|-------------------------------|-------------------------------|
| Ash2L   | 5'-ccgaaagtggggatgcaaact-3'   | 5'-gtcagcgggtgaaccattttgt-3'  |
| Cep192  | 5'-aaggtggatctttcaacacagac-3' | 5'-cgataacaggggttcagcaat-3'   |
| Cflar   | 5'-cagaggcaagatagccaagg-3'    | 5'-tggatgttcttcaggctttt-3'    |
| Chsy3   | 5'-agtctttgctcctactacggc-3'   | 5'-gtcccgaaaactgggacct-3'     |
| Ctnna1  | 5'-tcttctgcccctggtttctca-3'   | 5'-cctgtcccacacgctgaat-3'     |
| Duox1   | 5'-aaaacaccaggaacggattgt-3'   | 5'-agaagacattgggctgtaggg-3'   |
| Gmeb1   | 5'-gagaacccggaagacactaaaac-3' | 5'-ggctacaactgctgcgctat-3'    |
| Nrp     | 5'-tgggagccgtcatcgactt-3'     | 5'-gctcgacattacagctcactg-3'   |
| Ntrk2   | 5'-ctggggcttatgcctgctg-3'     | 5'-aggctcagtacaccaaatccta-3'  |
| Sucla2  | 5'-acccttcgctgcatgaatac-3'    | 5'-cctgtgcctttatcacaacatcc-3' |
| Tmem107 | 5'-aattcaccgccggaggaatacg-3'  | 5'-agggtttcttttcagcccaa-3'    |
| Unc13b  | 5'-ccagaacgtgaagagcacia-3'    | 5'-cagtccttgttccacacct-3'     |
| Zcchc11 | 5'-agagtgaactcgtctctcc-3'     | 5'-aacatacaacctcagtgaaattc-3' |
| Zfp597  | 5'-agcagagaagccccattgaag-3'   | 5'-tcagagtagtgaacaacgggt-3'   |
| Zfp91   | 5'-gacctctatctctgccttcg-3'    | 5'-aaggagccagcttggacct-3'     |

| Target | Forward                     | Reverse                     |
|--------|-----------------------------|-----------------------------|
| Mef2c  | 5'-atcccgatgcagacgattcag-3' | 5'-aacagcacacaatcttgcct-3'  |
| Gapdh  | 5'-aggtcgggtgaacggatttg-3'  | 5'-ttagaccatgtagttgaggta-3' |

pAAV-shRNA cloning primer

| Target     | Forward                     | Reverse                   |
|------------|-----------------------------|---------------------------|
| pAAV-shRNA | 5'-cccctgaacctgaaacataaa-3' | 5'-cacagactgtgggagaagc-3' |

Supplementary Table 5. Primer list used in ChIP-PCR, qRT-PCR, and cloning
