# Supplementary material
Source: PubMed Central journal article supplement (PMC4925298)
Supplement: NIHMS783964-supplement-3.pdf [file NIHMS783964-supplement-3.pdf]

Corresponding Author: Marina R. Picciotto

Manuscript Number: NN-A51344

Manuscript Type: Article

# Main Figures: 6

# Supplementary Figures: 8

# Supplementary Tables: 5

# Supplementary Videos:                     

## Reporting Checklist for Nature Neuroscience

This checklist is used to ensure good reporting standards and to improve the reproducibility of published results. For more information, please read [Reporting Life Sciences Research](#).

Please note that in the event of publication, it is mandatory that authors include all relevant methodological and statistical information in the manuscript.

### ► Statistics reporting, by figure

- Please specify the following information for each panel reporting quantitative data, and where each item is reported (section, e.g. Results, & paragraph number).
- Each figure legend should ideally contain an exact sample size (n) for each experimental group/condition, where n is an exact number and not a range, a clear definition of how n is defined (for example x cells from x slices from x animals from x litters, collected over x days), a description of the statistical test used, the results of the tests, any descriptive statistics and clearly defined error bars if applicable.
- For any experiments using custom statistics, please indicate the test used and stats obtained for each experiment.
- Each figure legend should include a statement of how many times the experiment shown was replicated in the lab; the details of sample collection should be sufficiently clear so that the replicability of the experiment is obvious to the reader.
- For experiments reported in the text but not in the figures, please use the paragraph number instead of the figure number.

**Note:** Mean and standard deviation are not appropriate on small samples, and plotting independent data points is usually more informative. When technical replicates are reported, error and significance measures reflect the experimental variability and not the variability of the biological process; it is misleading not to state this clearly.

|                   |                           | TEST USED             |              | n                                  |                       |                             | DESCRIPTIVE STATS (AVERAGE, VARIANCE) |             | P VALUE               |                 | DEGREES OF FREEDOM & F/t/z/R/ETC VALUE |  |
|-------------------|---------------------------|-----------------------|--------------|------------------------------------|-----------------------|-----------------------------|---------------------------------------|-------------|-----------------------|-----------------|----------------------------------------|--|
| FIGURE NUMBER     | WHICH TEST?               | SECTION & PARAGRAPH # | EXACT VALUE  | DEFINED?                           | SECTION & PARAGRAPH # | REPORTED?                   | SECTION & PARAGRAPH #                 | EXACT VALUE | SECTION & PARAGRAPH # | VALUE           | SECTION & PARAGRAPH #                  |  |
| example<br>1a     | one-way ANOVA             | Fig. legend           | 9, 9, 10, 15 | mice from at least 3 litters/group | Methods para 8        | error bars are mean +/- SEM | Fig. legend                           | p = 0.044   | Fig. legend           | F(3, 36) = 2.97 | Fig. legend                            |  |
| example<br>para 6 | unpaired t-test           | Results para 6        | 15           | slices from 10 mice                | Results para 6        | error bars are mean +/- SEM | Results para 6                        | p = 0.0006  | Results para 6        | t(28) = 2.808   | Results para 6                         |  |
| +<br>1b           | Student t-test (Unpaired) | Fig. legend           | 25           | 5 brains per condition             |                       | 0.16515 +/- 0.01714786      |                                       | p=0.003056  |                       | t(23)=3.310     |                                        |  |

| FIGURE NUMBER | TEST USED                       |                       | n                                        |                                                                                 |                       | DESCRIPTIVE STATS (AVERAGE, VARIANCE) |                                       | P VALUE                                                                                          |                       | DEGREES OF FREEDOM & F/t/z/R/ETC VALUE                                                             |                       |
|---------------|---------------------------------|-----------------------|------------------------------------------|---------------------------------------------------------------------------------|-----------------------|---------------------------------------|---------------------------------------|--------------------------------------------------------------------------------------------------|-----------------------|----------------------------------------------------------------------------------------------------|-----------------------|
|               | WHICH TEST?                     | SECTION & PARAGRAPH # | EXACT VALUE                              | DEFINED?                                                                        | SECTION & PARAGRAPH # | REPORTED?                             | SECTION & PARAGRAPH #                 | EXACT VALUE                                                                                      | SECTION & PARAGRAPH # | VALUE                                                                                              | SECTION & PARAGRAPH # |
| +<br>-<br>1c  | unpaired t-test                 | Fig. 1 legend         | Sac = 26, Nic = 25<br>Sac = 19, Nic = 29 | Pre- and postnatal slices from 6 mice<br>Postnatal slices from 5 mice           | Fig. 1 legend         | 9.04 ± 0.45<br>10.13 ± 0.45           | Supplementary source data spreadsheet | p=0.00000460<br>p=0.00001002                                                                     | Fig. 1 legend         | t(49)=5.151<br>t(46)=4.961                                                                         | Fig. 1 legend         |
| +<br>-<br>1d  | one-way ANOVA; repeated measure | Fig. 1 legend         | Sac = 40<br>Nic = 75                     | slices from 6 mice<br>6-8 neurons/animal from 2-5 sections averaged per subject | Fig. 1 legend         | Data expressed as mean +/- SEM        | Supplementary source data spreadsheet | Main effect (Treatment) p=0.00329026<br>Interaction (Distance x treatment) (Distance) p=0.070101 | Fig. 1 legend         | Main effect (treatment) F(1,113)=9.019<br>Interaction (Distance x treatment) F(4.3,485.1) = 2.139  | Fig. 1 legend         |
| +<br>-<br>1e  | one-way ANOVA; repeated measure | one-way ANOVA         | Sac = 26<br>Nic = 24                     | slices from 6 mice<br>6-8 neurons/animal from 2-5 sections averaged per subjec  | Fig. 1 legend         | Data expressed as mean +/- SEM        | Supplementary source data spreadsheet | Main effect (Treatment) p=0.00000085<br>Interaction (Distance x treatment) (Distance) p=0.000522 | Fig. 1 legend         | Main effect (treatment) F(1,48)=31.924<br>Interaction (Distance x treatment) F(4.8,214.7) = 4.882  | Fig. 1 legend         |
| +<br>-<br>1f  | one-way ANOVA; repeated measure | Fig. 1 legend         | Sac = 25<br>Nic = 15                     | slices from 6 mice<br>6-8 neurons/animal from 2-5 sections averaged per subjec  | Fig. 1 legend         | Data expressed as mean +/- SEM        | Supplementary source data spreadsheet | Main effect (Treatment) p=0.00000165<br>Interaction (Distance x treatment) (Distance) p=0.000003 | Fig. 1 legend         | Main effect (treatment) F(1,38)=32.082<br>Interaction (Distance x treatment) F(2.9,108.6) = 11.256 | Fig. 1 legend         |
| +<br>-<br>1g  | one-way ANOVA; repeated measure | Fig. 1 legend         | Sac = 20<br>Nic = 15                     | slices from 6 mice<br>6-8 neurons/animal from 2-5 sections averaged per subjec  | Fig. 1 legend         | Data expressed as mean +/- SEM        | Supplementary source data spreadsheet | Main effect (treatment) p=0.0000661<br>Interaction (Distance x treatment) p=0.014492             | Fig. 1 legend         | Main effect (treatment) F(1,33) = 20.835<br>Interaction (Distance x treatment) F(2.6,86.4)=3.939   | Fig. 1 legend         |
| +<br>-<br>1h  | one-way ANOVA; repeated measure | Fig. 1 legend         | Sac = 34<br>Nic = 53                     | slices from 6 mice<br>6-8 neurons/animal from 2-5 sections averaged per subjec  | Fig. 1 legend         | Data expressed as mean +/- SEM        | Supplementary source data spreadsheet | Main effect (treatment) p=0.00000210<br>Interaction (Distance x treatment) p=0.000779            | Fig. 1 legend         | Main effect (treatment) F(1,85) = 25.927<br>Interaction (Distance x treatment) F(4.1,350.2) =4.794 | Fig. 1 legend         |

| +<br>- | 1i | one-way ANOVA; repeated measure                          | Fig. 1 legend | Sac = 13<br>Nic = 19                                                                                      | slices from 6 mice<br>6-8 neurons/<br>animal from 2-5<br>sections averaged<br>per subjec                         | Fig. 1 legend | Data expressed as<br>mean +/- SEM                                                                                                                                                                                                                                                                                                                                                                                                                         | Suppl<br>ement<br>ary<br>sourc<br>e data<br>sprea<br>d<br>sheet | Main effect<br>(treatment)<br>p=0.00020270<br><br>Interaction<br>(Distance x<br>treatment)<br>p=0.007276                                                                                                                                                                                                                                                                                                                                                                                                                         | Fig. 1 legend | Main effect<br>(treatment)<br>F(1, 30)=17.452<br><br>Interaction<br>(Distance x<br>treatment)<br>F(4,120)=3.681                                                                                                                                                                                                                                                                                                                                                                                                                    | Fig. 1 legend |
|--------|----|----------------------------------------------------------|---------------|-----------------------------------------------------------------------------------------------------------|------------------------------------------------------------------------------------------------------------------|---------------|-----------------------------------------------------------------------------------------------------------------------------------------------------------------------------------------------------------------------------------------------------------------------------------------------------------------------------------------------------------------------------------------------------------------------------------------------------------|-----------------------------------------------------------------|----------------------------------------------------------------------------------------------------------------------------------------------------------------------------------------------------------------------------------------------------------------------------------------------------------------------------------------------------------------------------------------------------------------------------------------------------------------------------------------------------------------------------------|---------------|------------------------------------------------------------------------------------------------------------------------------------------------------------------------------------------------------------------------------------------------------------------------------------------------------------------------------------------------------------------------------------------------------------------------------------------------------------------------------------------------------------------------------------|---------------|
| +<br>- | 2c | one-way ANOVA                                            |               | Biological repliBiolo<br>gical replicates<br>Sac=5<br>Nic=5<br>Animal<br>(Female)<br>Nic = 13<br>Sac = 15 | 2 or 3 animals<br>(Female) were<br>pooled one<br>biological replicate,<br>animals randomly<br>assigned to groups | Fig. 2 legend | Ash2l;<br>2.81 ± 0.45<br><br>Chsy3;<br>1.93 ± 0.17<br><br>Zfp91;<br>1.355 ± 0.05<br><br>Cflar;<br>1.292 ± 0.14<br><br>Zcchc11;<br>1.20 ± 0.07<br><br>Cep192;<br>2.56 ± 0.21<br><br>Gmeb1;<br>1.03 ± 0.01<br><br>Alkbh1;<br>1.27 ± 0.05<br><br>Unc13b;<br>1.17 ± 0.03<br><br>Duox1;<br>0.94 ± 0.07<br><br>Scula2;<br>1.06 ± 0.05<br><br>Zfp597;<br>0.82 ± 0.05<br><br>Ctnnal1;<br>0.87 ± 0.05<br><br>Ntrk2;<br>0.84 ± 0.032<br><br>Tmem107;<br>0.57 ± 0.04 | Suppl<br>ement<br>ary<br>sourc<br>e data<br>sprea<br>d<br>sheet | p=0.01096250<br>for Ash2l;<br><br>p=0.00051163<br>for Chsy3;<br><br>p=0.00539670<br>for Zfp91;<br><br>p=0.21311592<br>for Cflar;<br><br>p=0.04718863<br>for Zcchc11;<br><br>p=0.00058407<br>for Cep192;<br><br>p=0.53699305<br>for Gmeb1;<br><br>p=0.00363940<br>for Alkbh1;<br><br>p=0.53699305<br>for Unc13b;<br><br>p=0.30709203<br>for Duox1;<br><br>p=0.24421686<br>for Scula2;<br><br>p=0.18074252<br>for Zfp597;<br><br>p=0.00582675<br>for Ctnnal1;<br><br>p=0.00644127<br>for Ntrk2;<br><br>p=0.00066513<br>for Tmem107 | Fig. 1 legend | F(1,8)=10.848 for<br>Ash2l;<br><br>F(1,8)=31.334 for<br>Chsy3;<br><br>F(1,8)=14.28 for<br>Zfp91;<br><br>F(1,8)=1.83 for<br>Cflar;<br><br>F(1,8)=5.49 for<br>Zcchc11;<br><br>F(1,8)=30.084 for<br>Cep192;<br><br>F(1,8)=0.416 for<br>Gmeb1;<br><br>F(1,8)=16.474 for<br>Alkbh1;<br><br>F(1,8)=0.416 for<br>Unc13b;<br><br>F(1,8)=1.19 for<br>Duox1;<br><br>F(1,8)=1.58 for<br>Scula2;<br><br>F(1,8)=2.15 for<br>Zfp597;<br><br>F(1,8)=13.878 for<br>Ctnnal1;<br><br>F(1,8)=13.364 for<br>Ntrk2;<br><br>F(1,8)=28.897 for<br>Tmem107 | Fig. 1 legend |
| +<br>- | 2d | one-way ANOVA;<br>Tukey's multiple<br>comparison<br>test |               | Biological replicates<br>Sac=5<br>Nic=5<br>Animal<br>(Female)<br>Nic = 13<br>Sac = 15                     | 2 or 3 animals<br>(Female) were<br>pooled one<br>biological replicate,<br>animals randomly<br>assigned to groups | Fig. 2 legend | Ash2l<br>pre&postnatal;<br>1.23 ± 0.07<br><br>Ash2l<br>postnatal;<br>1.25 ± 0.05                                                                                                                                                                                                                                                                                                                                                                          | Suppl<br>ement<br>ary<br>sourc<br>e data<br>sprea<br>d<br>sheet | Main effect;<br>p=0.003411<br><br>pre & postnal<br>Ash2l Sac<br>vs<br>As2l Nic<br>p=0.030603<br><br>Postnal<br>Ash2l Sac<br>vs<br>As2l Nic<br>p=0.033186                                                                                                                                                                                                                                                                                                                                                                         |               | main effect;<br>F(3,16)=6.898                                                                                                                                                                                                                                                                                                                                                                                                                                                                                                      |               |

|        |              |                                                  |  |                                                                     |                                                                                                   |               |                                                                      |                                       |                                                                                                                                   |  |                             |  |
|--------|--------------|--------------------------------------------------|--|---------------------------------------------------------------------|---------------------------------------------------------------------------------------------------|---------------|----------------------------------------------------------------------|---------------------------------------|-----------------------------------------------------------------------------------------------------------------------------------|--|-----------------------------|--|
| +<br>- | 2e           | one-way ANOVA; Tukey's multiple comparison test; |  | Biological replicates Sac=5 Nic=5 Animal (Female) Nic = 11 Sac = 15 | 2 or 3 animals (Female) were pooled one biological replicate, animals randomly assigned to groups | Fig. 2 legend | Ash2l pre&postnatal; 2.82±/-0.45<br><br>Ash2l postnatal; 1.94 ± 0.16 | Supplementary source data spreadsheet | Main effect; p=0.000413<br><br>pre & postnatal Ash2l Sac vs As2l Nic p=0.002299<br><br>Postnatal Ash2l Sac vs As2l Nic p=0.013523 |  | main effect; F(3,16)=10.736 |  |
| +<br>- | 3e<br>Gapdh  | one-way ANOVA                                    |  | Biological replicates Sac=5 Nic=5 Animal (Female) Nic = 15 Sac = 17 | 2 or 4 animals (Female) were pooled one biological replicate, animals randomly assigned to groups | Fig. 3 legend | 1.005±0.08                                                           | Supplementary source data spreadsheet | p=1                                                                                                                               |  | F(1,8)=0.00                 |  |
| +<br>- | 3e<br>Eif4a2 | one-way ANOVA                                    |  | Biological replicates Sac=5 Nic=5 Animal (Female) Nic = 15 Sac = 17 | 2 or 4 animals (Female) were pooled one biological replicate, animals randomly assigned to groups | Fig. 3 legend | 4.06 ± 0.50                                                          | Supplementary source data spreadsheet | p=0.00051003                                                                                                                      |  | F(1,8)=31.364               |  |
| +<br>- | 3e<br>Izum1  | one-way ANOVA                                    |  | Biological replicates Sac=3 Nic=5 Animal (Female) Nic = 15 Sac = 17 | 2 or 4 animals (Female) were pooled one biological replicate, animals randomly assigned to groups | Fig. 3 legend | 1.754±0.50                                                           | Supplementary source data spreadsheet | p=0.37940979                                                                                                                      |  | F(1,6)=0.900                |  |
| +<br>- | 3e<br>Gpr19  | one-way ANOVA                                    |  | Biological replicates Sac=5 Nic=5 Animal (Female) Nic = 15 Sac = 17 | 2 or 4 animals (Female) were pooled one biological replicate, animals randomly assigned to groups | Fig. 3 legend | 2.69 ± 0.47                                                          | Supplementary source data spreadsheet | p=0.01661552                                                                                                                      |  | F(1,8)=9.107                |  |
| +<br>- | 3e<br>Litaf  | one-way ANOVA                                    |  | Biological replicates Sac=5 Nic=5 Animal (Female) Nic = 15 Sac = 17 | 2 or 4 animals (Female) were pooled one biological replicate, animals randomly assigned to groups | Fig. 3 legend | 2.38 ± 0.58                                                          | Supplementary source data spreadsheet | p=0.0461961                                                                                                                       |  | F(1,8)=5.554                |  |
| +<br>- | 3e<br>kcnq1  | one-way ANOVA                                    |  | Biological replicates Sac=4 Nic=5 Animal (Female) Nic = 15 Sac = 17 | 2 or 4 animals (Female) were pooled one biological replicate, animals randomly assigned to groups | Fig. 3 legend | "1.44 ± 0.36                                                         | Supplementary source data spreadsheet | p=0.39946656                                                                                                                      |  | F(1,8)=0.792                |  |

|        |                   |                            |  |                                                                                    |                                                                                                  |               |               |                                       |              |  |                |  |
|--------|-------------------|----------------------------|--|------------------------------------------------------------------------------------|--------------------------------------------------------------------------------------------------|---------------|---------------|---------------------------------------|--------------|--|----------------|--|
| +<br>- | 3e<br>Lage<br>3   | one-way<br>ANOVA           |  | Biological replicates<br>Sac=5<br>Nic=5<br>Animal (Female)<br>Nic = 15<br>Sac = 17 | 2 to 4 animals (Female) were pooled one biological replicate, animal randomly assigned to groups | Fig. 3 legend | 4.04 ± 0.49   | Supplementary source data spreadsheet | p=0.00367444 |  | F(1,8)=16.418  |  |
| +<br>- | 3e<br>Fbxw<br>4   | one-way<br>ANOVA           |  | Biological replicates<br>Sac=5<br>Nic=5<br>Animal (Female)<br>Nic = 15<br>Sac = 17 | 2 to 4 animals (Female) were pooled one biological replicate, animal randomly assigned to groups | Fig. 3 legend | 4.90 ± 0.91   | Supplementary source data spreadsheet | p=0.00287307 |  | F(1,8)=17.9    |  |
| +<br>- | 3e<br>Fgf12       | one-way<br>ANO3e<br>Rin2VA |  | Biological replicates<br>Sac=5<br>Nic=5<br>Animal (Female)<br>Nic = 15<br>Sac = 17 | 2 to 4 animals (Female) were pooled one biological replicate, animal randomly assigned to groups | Fig. 3 legend | 6.73 ± 1.36   | Supplementary source data spreadsheet | p=0.00750159 |  | F(1,7)=13.804  |  |
| +<br>- | 3e<br>Seps<br>ecs | one-way<br>ANO3e<br>Rin2VA |  | Biological replicates<br>Sac=5<br>Nic=5<br>Animal (Female)<br>Nic = 15<br>Sac = 17 | 2 to 4 animals (Female) were pooled one biological replicate, animal randomly assigned to groups | Fig. 3 legend | 1.318 ± 0.182 | Supplementary source data spreadsheet | p=0.02502024 |  | F(1,8)=7.568   |  |
| +<br>- | 3e<br>Rin2        | one-way<br>ANOVA           |  | Biological replicates<br>Sac=5<br>Nic=5<br>Animal (Female)<br>Nic = 15<br>Sac = 17 | 2 to 4 animals (Female) were pooled one biological replicate, animal randomly assigned to groups | Fig. 3 legend | 2.75 ± 0.29   | Supplementary source data spreadsheet | p=0.00039509 |  | F(1,8)=33.897  |  |
| +<br>- | 3e<br>Rabg<br>ap1 | one-way<br>ANOVA           |  | Biological replicates<br>Sac=5<br>Nic=5<br>Animal (Female)<br>Nic = 15<br>Sac = 17 | 2 to 4 animals (Female) were pooled one biological replicate, animal randomly assigned to groups | Fig. 3 legend | 2.43 ± 0.37   | Supplementary source data spreadsheet | p=0.00981340 |  | F(1,8)=11.344  |  |
| +<br>- | 3e<br>Ano2        | one-way<br>ANOVA           |  | Biological replicates<br>Sac=5<br>Nic=5<br>Animal (Female)<br>Nic = 15<br>Sac = 17 | 2 to 4 animals (Female) were pooled one biological replicate, animal randomly assigned to groups | Fig. 3 legend | 2.72 ± 0.05   | Supplementary source data spreadsheet | p=0.00000649 |  | F(1,8)=107.443 |  |
| +<br>- | 3e<br>Apo<br>I    | one-way<br>ANOVA           |  | Biological replicates<br>Sac=5<br>Nic=5<br>Animal (Female)<br>Nic = 15<br>Sac = 17 | 2 to 4 animals (Female) were pooled one biological replicate, animal randomly assigned to groups | Fig. 3 legend | 1.68 ± 0.05   | Supplementary source data spreadsheet | p=0.00000418 |  | F(1,8)=120.782 |  |

|        |               |                  |  |                                                                                    |                                                                                                  |               |             |                                       |              |  |                |  |
|--------|---------------|------------------|--|------------------------------------------------------------------------------------|--------------------------------------------------------------------------------------------------|---------------|-------------|---------------------------------------|--------------|--|----------------|--|
| +<br>- | 3e<br>Lipc    | one-way<br>ANOVA |  | Biological replicates<br>Sac=5<br>Nic=5<br>Animal (Female)<br>Nic = 15<br>Sac = 17 | 2 to 4 animals (Female) were pooled one biological replicate, animal randomly assigned to groups | Fig. 3 legend | 2.86 ± 0.05 | Supplementary source data spreadsheet | p=0.00000    |  | F(1,8)=893.328 |  |
| +<br>- | 3e<br>Cdk5rap | one-way<br>ANOVA |  | Biological replicates<br>Sac=5<br>Nic=5<br>Animal (Female)<br>Nic = 15<br>Sac = 17 | 2 to 4 animals (Female) were pooled one biological replicate, animal randomly assigned to groups | Fig. 3 legend | 2.34 ± 0.28 | Supplementary source data spreadsheet | p=0.00132739 |  | F(1,8)=23.198  |  |
| +<br>- | 3e<br>Ing4    | one-way<br>ANOVA |  | Biological replicates<br>Sac=5<br>Nic=5<br>Animal (Female)<br>Nic = 15<br>Sac = 17 | 2 to 4 animals (Female) were pooled one biological replicate, animal randomly assigned to groups | Fig. 3 legend | 2.20 ± 0.35 | Supplementary source data spreadsheet | p=0.01328880 |  | F(1,8)=10.019  |  |
| +<br>- | 3e<br>Ank3    | one-way<br>ANOVA |  | Biological replicates<br>Sac=5<br>Nic=5<br>Animal (Female)<br>Nic = 15<br>Sac = 17 | 2 to 4 animals (Female) were pooled one biological replicate, animal randomly assigned to groups | Fig. 3 legend | 1.65 ± 0.19 | Supplementary source data spreadsheet | p=0.00964250 |  | F(1,8)=11.424  |  |
| +<br>- | 3e<br>Ntm     | one-way<br>ANOVA |  | Biological replicates<br>Sac=5<br>Nic=4<br>Animal (Female)<br>Nic = 15<br>Sac = 17 | 2 to 4 animals (Female) were pooled one biological replicate, animal randomly assigned to groups | Fig. 3 legend | 2.17 ± 0.06 | Supplementary source data spreadsheet | p=0.00000038 |  | F(1,7)=330.474 |  |
| +<br>- | 3e<br>Zfp658  | one-way<br>ANOVA |  | Biological replicates<br>Sac=5<br>Nic=4<br>Animal (Female)<br>Nic = 15<br>Sac = 17 | 2 to 4 animals (Female) were pooled one biological replicate, animal randomly assigned to groups | Fig. 3 legend | 2.17 ± 0.06 | Supplementary source data spreadsheet | p=0.00000669 |  | F(1,7)=141.861 |  |
| +<br>- | 3e<br>csda    | one-way<br>ANOVA |  | Biological replicates<br>Sac=5<br>Nic=5<br>Animal (Female)<br>Nic = 15<br>Sac = 17 | 2 to 4 animals (Female) were pooled one biological replicate, animal randomly assigned to groups | Fig. 3 legend | 2.95 ± 0.66 | Supplementary source data spreadsheet | p=0.01988645 |  | F(1,8)=8.411   |  |
| +<br>- | 3e<br>Sorcs1  | one-way<br>ANOVA |  | Biological replicates<br>Sac=5<br>Nic=4<br>Animal (Female)<br>Nic = 15<br>Sac = 17 | 2 to 4 animals (Female) were pooled one biological replicate, animal randomly assigned to groups | Fig. 3 legend | 2.31 ± 0.64 | Supplementary source data spreadsheet | p=0.05346909 |  | F(1,7)=5.378   |  |

|        |             |                  |  |                                                                                        |                                                                                                  |               |             |                                       |              |  |                |  |
|--------|-------------|------------------|--|----------------------------------------------------------------------------------------|--------------------------------------------------------------------------------------------------|---------------|-------------|---------------------------------------|--------------|--|----------------|--|
| +<br>- | 3e<br>Lars2 | one-way<br>ANOVA |  | Biological replicates<br>Sac=5<br>Nic=4<br>Animal (Female)<br>Nic = 15<br>Sac = 17     | 2 to 4 animals (Female) were pooled one biological replicate, animal randomly assigned to groups | Fig. 3 legend | 1.96 ± 0.20 | Supplementary source data spreadsheet | p=0.00195662 |  | F(1,7)=23.081  |  |
| +<br>- | 3e<br>Ank1  | one-way<br>ANOVA |  | Biological replicates<br>Sac=5<br>Nic=4<br>Animal (Female)<br>Nic = 15<br>Sac = 17     | 2 to 4 animals (Female) were pooled one biological replicate, animal randomly assigned to groups | Fig. 3 legend | 2.71 ± 0.19 | Supplementary source data spreadsheet | p=0.00023397 |  | F(1,7)=47.436  |  |
| +<br>- | 3e<br>Acacb | one-way<br>ANOVA |  | Biological replicates<br>Sac=5<br>Nic=4<br>Animal (Female)<br>Nic = 15<br>Sac = 174, 5 | 2 to 4 animals (Female) were pooled one biological replicate, animal randomly assigned to groups | Fig. 3 legend | 4.55 ± 0.35 | Supplementary source data spreadsheet | p=0.00000930 |  | F(1,7)=128.527 |  |
| +<br>- | 3e<br>Mgda2 | one-way<br>ANOVA |  | Biological replicates<br>Sac=5<br>Nic=4<br>Animal (Female)<br>Nic = 15<br>Sac = 17     | 2 to 4 animals (Female) were pooled one biological replicate, animal randomly assigned to groups | Fig. 3 legend | 5.98 ± 1.71 | Supplementary source data spreadsheet | p=0.01333907 |  | F(1,7)=10.811  |  |
| +<br>- | 3e<br>Chl1  | one-way<br>ANOVA |  | Biological replicates<br>Sac=5<br>Nic=4<br>Animal (Female)<br>Nic = 15<br>Sac = 17     | 2 to 4 animals (Female) were pooled one biological replicate, animal randomly assigned to groups | Fig. 3 legend | 1.97 ± 0.17 | Supplementary source data spreadsheet | p=0.00348039 |  | F(1,7)=18.662  |  |
| +<br>- | 3e<br>Aut2  | one-way<br>ANOVA |  | Biological replicates<br>Sac=5<br>Nic=5<br>Animal (Female)<br>Nic = 15<br>Sac = 17     | 2 to 4 animals (Female) were pooled one biological replicate, animal randomly assigned to groups | Fig. 3 legend | 2.24 ± 0.37 | Supplementary source data spreadsheet | p=0.00986976 |  | F(1,8)=11.318  |  |
| +<br>- | 3e<br>Mbnl1 | one-way<br>ANOVA |  | Biological replicates<br>Sac=5<br>Nic=5<br>Animal (Female)<br>Nic = 15<br>Sac = 17     | 2 to 4 animals (Female) were pooled one biological replicate, animal randomly assigned to groups | Fig. 3 legend | 1.94 ± 0.17 | Supplementary source data spreadsheet | p=0.00063647 |  | F(1,8)=29.295  |  |
| +<br>- | 3e<br>Cpeb1 | one-way<br>ANOVA |  | Biological replicates<br>Sac=5<br>Nic=5<br>Animal (Female)<br>Nic = 15<br>Sac = 17     | 2 to 4 animals (Female) were pooled one biological replicate, animal randomly assigned to groups | Fig. 3 legend | 3.84 ± 0.23 | Supplementary source data spreadsheet | p=0.00000232 |  | F(1,8)=141.042 |  |

|        |                     |                  |  |                                                                     |                                                                                                  |               |             |                                       |              |  |                |  |
|--------|---------------------|------------------|--|---------------------------------------------------------------------|--------------------------------------------------------------------------------------------------|---------------|-------------|---------------------------------------|--------------|--|----------------|--|
| +<br>- | 3e<br>Zfp7<br>1-rs1 | one-way<br>ANOVA |  | Biological replicates Sac=5 Nic=5 Animal (Female) Nic = 15 Sac = 17 | 2 to 4 animals (Female) were pooled one biological replicate, animal randomly assigned to groups | Fig. 3 legend | 3.41 ± 0.08 | Supplementary source data spreadsheet | p=0.0000001  |  | F(1,8)=830.025 |  |
| +<br>- | 3e<br>Chd9          | one-way<br>ANOVA |  | Biological replicates Sac=5 Nic=5 Animal (Female) Nic = 15 Sac = 17 | 2 to 4 animals (Female) were pooled one biological replicate, animal randomly assigned to groups | Fig. 3 legend | 4.66 ± 0.16 | Supplementary source data spreadsheet | p=0.00000004 |  | F(1,8)=396.42  |  |
| +<br>- | 3e<br>Syt4          | one-way<br>ANOVA |  | Biological replicates Sac=5 Nic=5 Animal (Female) Nic = 15 Sac = 17 | Biological replicates Sac=5 Nic=5 Animal (Female) Nic = 15 Sac = 17                              | Fig. 3 legend | 3.35 ± 0.04 | Supplementary source data spreadsheet | p=0.00001422 |  | F(1,8)=87.029  |  |
| +<br>- | 3e<br>Sp11<br>0     | one-way<br>ANOVA |  | Biological replicates Sac=5 Nic=5 Animal (Female) Nic = 15 Sac = 17 | 2 to 4 animals (Female) were pooled one biological replicate, animal randomly assigned to groups | Fig. 3 legend | 2.02 ± 0.38 | Supplementary source data spreadsheet | p=0.02460310 |  | F(1,8)=7.628   |  |
| +<br>- | 3e<br>Sorbs2        | one-way<br>ANOVA |  | Biological replicates Sac=5 Nic=5 Animal (Female) Nic = 15 Sac = 17 | 2 to 4 animals (Female) were pooled one biological replicate, animal randomly assigned to groups | Fig. 3 legend | 2.22 ± 0.13 | Supplementary source data spreadsheet | p=0.00002176 |  | F(1,8)=77.526  |  |
| +<br>- | 3e<br>Slc35<br>a2   | one-way<br>ANOVA |  | Biological replicates Sac=5 Nic=5 Animal (Female) Nic = 15 Sac = 17 | 2 to 4 animals (Female) were pooled one biological replicate, animal randomly assigned to groups | Fig. 3 legend | 1.83 ± 0.14 | Supplementary source data spreadsheet | p=0.00027950 |  | F(1,8)=37.6    |  |
| +<br>- | 3e<br>Mef2<br>c     | one-way<br>ANOVA |  | Biological replicates Sac=5 Nic=5 Animal (Female) Nic = 15 Sac = 17 | 2 to 4 animals (Female) were pooled one biological replicate, animal randomly assigned to groups | Fig. 3 legend | 1.98 ± 0.17 | Supplementary source data spreadsheet | p=0.01088096 |  | F(1,8)=10.881  |  |



|   |   |    |                                                                   |                                                                                                                          |                                                                                                |               |                                                                                                                                                                                            |                                       |                                                                                                                                                                                                              |               |                                                                                                                             |               |
|---|---|----|-------------------------------------------------------------------|--------------------------------------------------------------------------------------------------------------------------|------------------------------------------------------------------------------------------------|---------------|--------------------------------------------------------------------------------------------------------------------------------------------------------------------------------------------|---------------------------------------|--------------------------------------------------------------------------------------------------------------------------------------------------------------------------------------------------------------|---------------|-----------------------------------------------------------------------------------------------------------------------------|---------------|
| + | - | 4a | one-way ANOVA; LSD's multiple comparison test                     | Saline = 4<br>Nicotine = 4<br>MEC = 4<br>MEC, Nic = 4                                                                    | 4 dishes with each treatment condition                                                         | Fig. 4 legend | Control;<br>1.85 ± 0.11<br><br>α-BTX;<br>1.45 ± 0.16<br><br>MLA;<br>1.71 ± 0.19<br><br>Atropine;<br>1.69 ± 0.18                                                                            | Supplementary source data spreadsheet | Main effect:<br>p=0.000001<br><br>Saline vs Nic;<br>p=0.009350;<br><br>α-BTX vs α-BTX.Nic;<br>p=0.003186<br><br>MLA vs MLA/Nic;<br>p=0.000001<br><br>Atropine vs Atropine/Nic;<br>p=0.000030                 |               | F(13,42)=12.540                                                                                                             |               |
| + | - | 4b | one-way ANOVA; LSD's multiple comparison test                     | 4                                                                                                                        | 4 dishes with each treatment condition                                                         | Fig. 4 legend | Control;<br>1.26 ± 0.05<br><br>α-BTX;<br>1.19 ± 0.16<br><br>MLA;<br>1.24 ± 0.01<br><br>Atropine;<br>1.13 ± 0.08                                                                            | Supplementary source data spreadsheet | Main effect:<br>p=0.000551<br><br>Saline vs Nic;<br>p=0.023076<br><br>α-BTX vs α-BTX.Nic;<br>p=0.010348<br><br>MLA vs MLA/Nic;<br>p=0.05<br><br>Atropine vs Atropine/Nic;<br>p=0.023488                      |               | F(13,42)=3.749                                                                                                              |               |
| + | - | 5b | one-way ANOVA; LSD's multiple comparison test                     | Scr sac = 20<br><br>Scr nic = 13<br><br>Ash2l sac = 26<br><br>Ash2l nic = 11<br><br>Mef2c sac = 17<br><br>Mef2c nic = 11 | Total counted cell number in 3 repeated experiments, 2-3 neurons were selected from coverslips | Fig. 5 legend | Scr sac;<br>4.36 ± 0.32<br><br>Scr nic;<br>8.25 ± 1.01<br><br>Ash2l sac;<br>2.45 ± 0.23<br><br>Ash2l nic;<br>2.12 ± 0.21<br><br>Mef2c sac;<br>2.72 ± 0.26<br><br>Mef2c nic;<br>2.28 ± 0.28 | Supplementary source data spreadsheet | Main effect:<br>p=0.0000001<br><br>Scr Sac vs Scr Nic = 0.000001                                                                                                                                             |               | Main effect:<br>F(5,108)=28.45                                                                                              |               |
| + | - | 5d | two-way ANOVA; repeated measure; Tukey's multiple comparison test | Fig. 5 legend<br><br>Scr, Sac = 32<br><br>Scr, Nic = 57<br><br>Ash2l, Sac = 22<br><br>Ash2l, Nic = 67                    | slices from 5 mice 4-6 neurons/ animal from 2-4 sections averaged per subject                  | Fig. 5 legend | Data expressed as mean +/- SEM                                                                                                                                                             | Supplementary source data spreadsheet | Main effect;<br>(gene)<br>p=0.0000001<br><br>(treatment)<br>p=0.215552<br><br>(gene x treatment)<br>p=0.00006893<br><br>Follow-up;<br>Scr sac vs Scr nic = 0.000581<br><br>Ash2l sac vs Ash2l nic = 0.229149 | Fig. 5 legend | Main effect;<br>(gene)<br>F(1,174)=30.006<br><br>(treatment)<br>F(1,174)=1.545<br><br>(gene x treatment)<br>F(1,174)=16.633 | Fig. 5 legend |

|        |    |                                                                   |               |                                                                                                      |                                                                               |               |                                                                                                                                                                                                   |                                       |                                                                                                                                                                                                                         |               |                                                                                                                         |               |
|--------|----|-------------------------------------------------------------------|---------------|------------------------------------------------------------------------------------------------------|-------------------------------------------------------------------------------|---------------|---------------------------------------------------------------------------------------------------------------------------------------------------------------------------------------------------|---------------------------------------|-------------------------------------------------------------------------------------------------------------------------------------------------------------------------------------------------------------------------|---------------|-------------------------------------------------------------------------------------------------------------------------|---------------|
| +<br>- | 5e | two-way ANOVA; repeated measure; Tukey's multiple comparison test | Fig. 5 legend | Scr, Sac = 26<br>Scr, Nic = 31<br>Ash2l, Sac = 27<br>Ash2l, Nic = 30                                 | slices from 5 mice 4-6 neurons/ animal from 2-4 sections averaged per subject | Fig. 5 legend | Data expressed as mean +/- SEM                                                                                                                                                                    | Supplementary source data spreadsheet | Main effect; (gene) $p=0.0000001$<br><br>(treatment) $p=0.0000001$<br><br>((gene x treatment) $p=0.0000001$<br><br>Follow-up; Scr sac vs Scr nic =0.0000001<br><br>Mef2c sac vs Mef2c nic =0.122684                     | Fig. 5 legend | Main effect; (gene) $F(1,110)=154.897$<br><br>(treatment) $F(1,110)=43.650$<br><br>(gene x treatment) $F(1,110)=95.076$ | Fig. 5 legend |
| +<br>- | 5f | one-way ANOVA; repeated measure; Tukey's multiple comparison test | Fig. 5 legend | OE, con = 28<br>OE, Ash2l = 22<br>OE, Mef2c Ash2l = 24                                               | slices from 5 mice 4-6 neurons/ animal from 2-4 sections averaged per subject | Fig. 5 legend | Data expressed as mean +/- SEM                                                                                                                                                                    | Supplementary source data spreadsheet | Main effect: $p=0.0000001$<br><br>OE con vs OE Ash2l =0.0000001<br><br>OE con vs OE Mef2c =0.0000001                                                                                                                    | Fig. 5 legend | Main effect; $F(2,71)=100.450$                                                                                          | Fig. 5 legend |
| +<br>- | 5g | one-way ANOVA; LSD's multiple comparison test                     |               | Scr sac = 21<br>Scr nic = 36<br>Ash2l sac = 34<br>Ash2l nic = 37<br>Mef2c sac = 23<br>Mef2c nic = 38 | slices from 5 mice 4-6 neurons/ animal from 2-4 sections averaged per subject | Fig. 5 legend | Scr sac; $5.76 \pm 1.03$<br><br>Scr nic; $12.26 \pm 0.98$<br><br>Ash2l sac; $4.12 \pm 1.64$<br><br>Ash2l nic; $5.02 \pm 0.78$<br><br>Mef2c sac; $8.33 \pm 1.28$<br><br>Mef2c nic; $8.20 \pm 1.36$ |                                       | Main effect: $p=0.0000001$<br><br>Scr sac vs Scr nic =0.0000001<br><br>Scr sac vs Mef2c sac =0.042553<br><br>Scr sac vs Mef2c nic =0.023182<br><br>Scr nic vs Mef2c sac =0.000158<br><br>Scr nic vs Mef2c nic =0.000295 | Fig. 5 legend | Main effect: $F(5,183)=10.748$                                                                                          | Fig. 5 legend |
| +<br>- | 5h | one-way ANOVA LSD's multiple comparison test                      |               | OE control = 34<br>OE Ash2l = 45<br>OE Mef2c =26                                                     | slices from 5 mice 4-6 neurons/ animal from 2-4 sections averaged per subject | Fig. 5 legend | OE control; $3.96 \pm 1.23$<br><br>OE Ash2l; $8.12 \pm 1.78$<br><br>OE Mef2c; $7.13 \pm 1.28$                                                                                                     | Supplementary source data spreadsheet | Main effect: $p=0.00000006$<br><br>OE con vs OE Ash2l =0.000033<br><br>OE con vs OE Mef2c =0.019220                                                                                                                     | Fig. 5 legend | Main effect: $F(2,102)=19.692$                                                                                          | Fig. 5 legend |

|        |                              |                                                 |                                          |                                                                                                                                |                                                                                                                                                                                           |                                          |                                                                                                                                                                          |                                                                 |                                                                                                                     |                                          |                                                                                                                         |                                          |
|--------|------------------------------|-------------------------------------------------|------------------------------------------|--------------------------------------------------------------------------------------------------------------------------------|-------------------------------------------------------------------------------------------------------------------------------------------------------------------------------------------|------------------------------------------|--------------------------------------------------------------------------------------------------------------------------------------------------------------------------|-----------------------------------------------------------------|---------------------------------------------------------------------------------------------------------------------|------------------------------------------|-------------------------------------------------------------------------------------------------------------------------|------------------------------------------|
| +<br>- | 6a                           | one-way ANOVA<br>LSD's multiple comparison test |                                          | Scr, Sac = 19<br><br>Scr, Nic = 24<br><br>Ash2l, Sac = 10<br><br>Ash2l, Nic = 60<br><br>Mef2c, Sac = 13<br><br>Mef2c, Nic = 15 | Aiming 10 -15 survived for in utero electroporation surgery per each condition (survival rate 40%), All survive pups (Female and Male) are used for behavior and neural structure analysi | Fig. 6 legend                            | Scr sac; 3.82 ± 1.06<br><br>Scr nic; 9.73 ± 1.56<br><br>Ash2l sac; 3.76 ± 1.26<br><br>Ash2l nic; 5.99 ± 1.06<br><br>Mef2c sac; 3.31 ± 0.79<br><br>Mef2c nic; 4.01 ± 0.66 | Suppl<br>ement<br>ary<br>sourc<br>e data<br>sprea<br>d<br>sheet | Main effect:<br>p=0.02090053<br><br>Scr sac vs<br>Scr nic<br>=0.015343<br><br>Scr nic vs<br>Ash2l nic<br>=0.009136  | Fig. 6 legend                            | Main effect:<br>F(5,135)=2.759                                                                                          | Fig. 6 legend                            |
| +<br>- | 6b                           | one-way ANOVA<br>LSD's multiple comparison test |                                          | OEcon = 31<br><br>OEAsh2l = 22<br><br>OEMef2c = 32                                                                             | Aiming 10 -15 survived for in utero electroporation surgery per each condition (survival rate 40%), All survive pups (Female and Male) are used for behavior and neural structure analysi | Fig. 6 legend                            | OE control; 4.06 ± 0.62<br><br>OE Ash2l; 11.61 ± 1.97<br><br>OE Mef2c; 8.05 ± 1.14                                                                                       | Suppl<br>ement<br>ary<br>sourc<br>e data<br>sprea<br>d<br>sheet | Main effect:<br>p=0.00031264<br><br>OE con vs<br>OE Ash2l;<br>p=0.000076<br><br>OE con vs<br>OE Mef2c<br>p=0.017160 | Fig. 6 legend                            | Main effect;<br>F(2,82) = 8.858                                                                                         | Fig. 6 legend                            |
| +<br>- | Suppl<br>ementary<br>Fig. 1a | one-way ANOVA<br>repeated measure               | Supple<br>menta<br>ry<br>Fig.1<br>legend | Sac = 28<br><br>Nic = 54                                                                                                       | slices from 5 mice 4-6 neurons/<br>animal from 2-4 sections averaged per subject                                                                                                          | Supple<br>menta<br>ry<br>Fig.1<br>legend | Data expressed as mean +/- SEM                                                                                                                                           | Suppl<br>ement<br>ary<br>sourc<br>e data<br>sprea<br>d<br>sheet | Main effect;<br>(treatment)<br>p=0.010321<br><br>Interaction<br>(Distance x<br>treatment)<br>p=0.000223             | Supple<br>menta<br>ry<br>Fig.1<br>legend | Main effect;<br>(treatment)<br>F(1,80)=6.901<br><br>Interaction<br>(Distance x<br>treatment)<br>F(12.740,301.475)=5.170 | Supple<br>menta<br>ry<br>Fig.1<br>legend |
| +<br>- | Suppl<br>ementary<br>Fig. 1b | one-way ANOVA<br>repeated measure               | Supple<br>menta<br>ry<br>Fig.1<br>legend | Sac = 36<br><br>Nic = 31                                                                                                       | slices from 5 mice 4-6 neurons/<br>animal from 2-4 sections averaged per subject                                                                                                          | Supple<br>menta<br>ry<br>Fig.1<br>legend | Data expressed as mean +/- SEM                                                                                                                                           | Suppl<br>ement<br>ary<br>sourc<br>e data<br>sprea<br>d<br>sheet | Main effect;<br>(treatment)<br>p=0.0000001<br><br>Interaction<br>(Distance x<br>treatment)<br>p=0.0000001           | Supple<br>menta<br>ry<br>Fig.1<br>legend | Main effect;<br>(treatment)<br>F(1,30)=16.525<br><br>Interaction<br>(Distance x<br>treatment)<br>F(4.683738.911)=6.471  | Supple<br>menta<br>ry<br>Fig.1<br>legend |
| +<br>- | Suppl<br>ementary<br>Fig. 1c | one-way ANOVA<br>repeated measure               | Supple<br>menta<br>ry<br>Fig.1<br>legend | Sac = 20<br><br>Nic = 12                                                                                                       | slices from 5 mice 4-6 neurons/<br>animal from 2-4 sections averaged per subject                                                                                                          | Supple<br>menta<br>ry<br>Fig.1<br>legend | Data expressed as mean +/- SEM                                                                                                                                           | Suppl<br>ement<br>ary<br>sourc<br>e data<br>sprea<br>d<br>sheet | Main effect;<br>(treatment)<br>p=0.000319<br><br>Interaction<br>(Distance x<br>treatment)<br>p=0.000488             | Supple<br>menta<br>ry<br>Fig.1<br>legend | Main effect;<br>(treatment)<br>F(1,65)=32.586<br><br>Interaction<br>(Distance x<br>treatment)<br>F(3.384,101.512)=6.016 | Supple<br>menta<br>ry<br>Fig.1<br>legend |
| +<br>- | Suppl<br>ementary<br>Fig. 1d | one-way ANOVA<br>repeated measure               | Supple<br>menta<br>ry<br>Fig.1<br>legend | Sac = 9<br><br>Nic = 13                                                                                                        | slices from 5 mice 4-6 neurons/<br>animal from 2-4 sections averaged per subject                                                                                                          | Supple<br>menta<br>ry<br>Fig.1<br>legend | Data expressed as mean +/- SEM                                                                                                                                           | Suppl<br>ement<br>ary<br>sourc<br>e data<br>sprea<br>d<br>sheet | Main effect;<br>(treatment)<br>p=0.027854<br><br>Interaction<br>(Distance x<br>treatment)<br>p=0.000488             | Supple<br>menta<br>ry<br>Fig.1<br>legend | Main effect;<br>(treatment)<br>F(1,20)=5.625<br><br>Interaction<br>(Distance x<br>treatment)<br>F(2.413,48.253)=1.176   | Supple<br>menta<br>ry<br>Fig.1<br>legend |

|        |                               |                                |                            |                                                                                 |                                                                                                   |                            |                                                                                                                                                                                                                                                                                                                                                                                                                                                    |                                       |                                                                                                                                                                                                                                                                                                                                                                                                                                                                                     |                            |                                                                                                                                                                                                                                                                                                                                                                                                                                                                            |                            |
|--------|-------------------------------|--------------------------------|----------------------------|---------------------------------------------------------------------------------|---------------------------------------------------------------------------------------------------|----------------------------|----------------------------------------------------------------------------------------------------------------------------------------------------------------------------------------------------------------------------------------------------------------------------------------------------------------------------------------------------------------------------------------------------------------------------------------------------|---------------------------------------|-------------------------------------------------------------------------------------------------------------------------------------------------------------------------------------------------------------------------------------------------------------------------------------------------------------------------------------------------------------------------------------------------------------------------------------------------------------------------------------|----------------------------|----------------------------------------------------------------------------------------------------------------------------------------------------------------------------------------------------------------------------------------------------------------------------------------------------------------------------------------------------------------------------------------------------------------------------------------------------------------------------|----------------------------|
| +<br>- | Supplementary Fig. 1e         | one-way ANOVA repeated measure | Supplementary Fig.1 legend | Sac = 18<br>Nic = 30                                                            | slices from 5 mice 4-6 neurons/ animal from 2-4 sections averaged per subject                     | Supplementary Fig.1 legend | Data expressed as mean +/- SEM                                                                                                                                                                                                                                                                                                                                                                                                                     | Supplementary source data spreadsheet | Main effect; (treatment) p=0.000565<br><br>Interaction (Distance x treatment) p=0.000015                                                                                                                                                                                                                                                                                                                                                                                            | Supplementary Fig.1 legend | Main effect; (treatment) F(1,46)=13.729<br><br>Interaction (Distance x treatment) F(3.824,175882) =2.785                                                                                                                                                                                                                                                                                                                                                                   | Supplementary Fig.1 legend |
| +<br>- | Supplementary Fig. 1f         | one-way ANOVA repeated measure | Supplementary Fig.1 legend | Sac = 10<br>Nic = 15                                                            | slices from 5 mice 4-6 neurons/ animal from 2-4 sections averaged per subject                     | Supplementary Fig.1 legend | Data expressed as mean +/- SEM                                                                                                                                                                                                                                                                                                                                                                                                                     | Supplementary source data spreadsheet | Main effect; (treatment) p=0.003299<br><br>Interaction (Distance x treatment) p=0.000643                                                                                                                                                                                                                                                                                                                                                                                            | Supplementary Fig.1 legend | Main effect; (treatment) F(1,23)=10.746<br><br>Interaction (Distance x treatment) F(3.291,75.697) =2.290                                                                                                                                                                                                                                                                                                                                                                   | Supplementary Fig.1 legend |
| +<br>- | Supplementary Fig. 2b         | one-way ANOVA                  |                            | Biological replicates Sac=5<br>Nic=5<br>Animal (Female)<br>Nic = 11<br>Sac = 15 | 2 or 3 animals (Female) were pooled one biological replicate, animals randomly assigned to groups | Supplementary Fig.2 legend | Ash2l;<br>1.23 ± 0.07<br><br>Chsy3;<br>1.35 ± 0.09<br><br>Zfp91<br>1.01 ± 0.012<br><br>Cflar;<br>1.30 ± 0.14<br><br>Zcchc11;<br>1.26 ± 0.04<br><br>Cep192;<br>1.17 ± 0.06<br><br>Alkbh1<br>1.27 ± 0.05<br><br>Gmeb1<br>1.00 ± 0.026<br><br>Unc13b<br>1.17 ± 0.028<br><br>Duox1<br>0.94 ± 0.07<br><br>Scula2;<br>1.10 ± 0.02<br><br>Zfhp597<br>0.82 ± 0.05<br><br>Ctnnal1<br>0.87 ± 0.050<br><br>Ntrk2<br>0.85 ± 0.03<br><br>Tmem107;<br>0.7 ± 0.09 | Supplementary source data spreadsheet | p=0.02365035 for Ash2l;<br><br>p=0.03127061 for Chsy3;<br><br>p=0.44681333 for zfp91;<br><br>p=0.53987164 for Cflar;<br><br>p=0.00087271 for Zcchc11;<br><br>p=0.05240060 for Cep192;<br><br>p=0.29780695 for Alkbh1;<br><br>p=0.42080639 for Gmeb1;<br><br>p=0.56511006 for Unc13b;<br><br>p=0.85625319 for Duox1;<br><br>p=0.01787528 for Scula2;<br><br>p=0.21198878 for Zfp597;<br><br>p=0.30899997 for Ctnnal1;<br><br>p=0.44341660 for Ntrk;<br><br>p=0.02625917 for Tmem107; |                            | F(1,8)=7.77 for Ash2l;<br><br>F(1,8)=6.797 for Chsy3;<br><br>F(1,8)=0.64 for Zfp91;<br><br>F(1,8)=0.41 for Cflar;<br><br>F(1,8)=26.538 for Zcchc11;<br><br>F(1,8)=5.18 for Cep192;<br><br>F(1,8)=1.24 for Alkbh1;<br><br>F(1,8)=0.72 for Gmeb1;<br><br>F(1,8)=0.36 for Unc13b;<br><br>F(1,8)=0.035 for Unc13b;<br><br>F(1,8)=8.82 for Scula2;<br><br>F(1,8)=1.84 for Zfp597;<br><br>F(1,8)=1.18 for Ctnnal1;<br><br>F(1,8)=0.65 for Ntrk;<br><br>F(1,8)=7.397 for Tmem107; |                            |
| +<br>- | Supplementary Fig. 3c Eif4a 2 | one-way ANOVA                  |                            | Biological replicates Sac=5<br>Nic=5<br>Animal (Female)<br>Nic = 12<br>Sac = 14 | 2 to 4 animals (Female) were pooled one biological replicate, animal randomly assigned to groups  | Supplementary Fig.4 legend | 1.67 ± 0.18                                                                                                                                                                                                                                                                                                                                                                                                                                        | Supplementary source data spreadsheet | p=0.01054575                                                                                                                                                                                                                                                                                                                                                                                                                                                                        |                            | F(1,8)=11.02                                                                                                                                                                                                                                                                                                                                                                                                                                                               |                            |

|   |                               |               |  |                                                                     |                                                                                                  |                            |              |                                       |              |  |               |  |
|---|-------------------------------|---------------|--|---------------------------------------------------------------------|--------------------------------------------------------------------------------------------------|----------------------------|--------------|---------------------------------------|--------------|--|---------------|--|
| + | Supplementary Fig. 3c Izumoi  | one-way ANOVA |  | Biological replicates Sac=5 Nic=5 Animal (Female) Nic = 12 Sac = 14 | 2 to 4 animals (Female) were pooled one biological replicate, animal randomly assigned to groups | Supplementary Fig.4 legend | 3.21 ± 0.96  | Supplementary source data spreadsheet | p=0.03961426 |  | F(1,8)=6.028  |  |
| + | Supplementary Fig. 3c Gpr19   | one-way ANOVA |  | Biological replicates Sac=5 Nic=5 Animal (Female) Nic = 12 Sac = 14 | 2 to 4 animals (Female) were pooled one biological replicate, animal randomly assigned to groups | Supplementary Fig.4 legend | "1.80 ± 0.84 | Supplementary source data spreadsheet | p=0.26974334 |  | F(1,8)=1.406  |  |
| + | Supplementary Fig. 3c Litaf   | one-way ANOVA |  | Biological replicates Sac=5 Nic=5 Animal (Female) Nic = 12 Sac = 14 | 2 to 4 animals (Female) were pooled one biological replicate, animal randomly assigned to groups | Supplementary Fig.4 legend | 3.85 ± 0.63  | Supplementary source data spreadsheet | p=0.00162698 |  | F(1,8)=21.7   |  |
| + | Supplementary Fig. 3c Kcnq1   | one-way ANOVA |  | Biological replicates Sac=5 Nic=5 Animal (Female) Nic = 12 Sac = 14 | 2 to 4 animals (Female) were pooled one biological replicate, animal randomly assigned to groups | Supplementary Fig.4 legend | 1.62 ± 0.15  | Supplementary source data spreadsheet | p=0.00406270 |  | F(1,8)=15.839 |  |
| + | Supplementary Fig. 3c Lage3   | one-way ANOVA |  | Biological replicates Sac=5 Nic=5 Animal (Female) Nic = 12 Sac = 14 | 2 to 4 animals (Female) were pooled one biological replicate, animal randomly assigned to groups | Supplementary Fig.4 legend | 3.51 ± 0.59  | Supplementary source data spreadsheet | p=0.00236227 |  | F(1,8)=19.147 |  |
| + | Supplementary Fig. 3c Fbxw4   | one-way ANOVA |  | Biological replicates Sac=5 Nic=5 Animal (Female) Nic = 12 Sac = 14 | 2 to 4 animals (Female) were pooled one biological replicate, animal randomly assigned to groups | Supplementary Fig.4 legend | 2.92 ± 0.45  | Supplementary source data spreadsheet | p=0.00305973 |  | F(1,8)=17.512 |  |
| + | Supplementary Fig. 3c Fgf12   | one-way ANOVA |  | Biological replicates Sac=5 Nic=5 Animal (Female) Nic = 12 Sac = 14 | 2 to 4 animals (Female) were pooled one biological replicate, animal randomly assigned to groups | Supplementary Fig.4 legend | 6.76 ± 1.37  | Supplementary source data spreadsheet | p=0.00356573 |  | F(1,8)=16.594 |  |
| + | Supplementary Fig. 3c Sepsacs | one-way ANOVA |  | Biological replicates Sac=5 Nic=5 Animal (Female) Nic = 12 Sac = 14 | 2 to 4 animals (Female) were pooled one biological replicate, animal randomly assigned to groups | Supplementary Fig.4 legend | 3.01 ± 0.16  | Supplementary source data spreadsheet | p=0.00002212 |  | F(1,8)=77.18  |  |

|        |                                |               |  |                                                                     |                                                                                                  |                            |             |                                       |              |  |                |  |
|--------|--------------------------------|---------------|--|---------------------------------------------------------------------|--------------------------------------------------------------------------------------------------|----------------------------|-------------|---------------------------------------|--------------|--|----------------|--|
| +<br>- | Supplementary Fig. 3c Rin2     | one-way ANOVA |  | Biological replicates Sac=5 Nic=5 Animal (Female) Nic = 12 Sac = 14 | 2 to 4 animals (Female) were pooled one biological replicate, animal randomly assigned to groups | Supplementary Fig.4 legend | 2.30 ± 0.15 | Supplementary source data spreadsheet | p=0.01341607 |  | F(1,8)=9.979   |  |
| +<br>- | Supplementary Fig. 3c Rabgap1l | one-way ANOVA |  | Biological replicates Sac=5 Nic=5 Animal (Female) Nic = 12 Sac = 14 | 2 to 4 animals (Female) were pooled one biological replicate, animal randomly assigned to groups | Supplementary Fig.4 legend | 2.65 ± 0.19 | Supplementary source data spreadsheet | p=0.00004215 |  | F(1,8)=64.634  |  |
| +<br>- | Supplementary Fig. 3c Ano2     | one-way ANOVA |  | Biological replicates Sac=5 Nic=5 Animal (Female) Nic = 12 Sac = 14 | 2 to 4 animals (Female) were pooled one biological replicate, animal randomly assigned to groups | Supplementary Fig.4 legend | 3.44 ± 0.21 | Supplementary source data spreadsheet | p=0.00001803 |  | F(1,8)=81.61   |  |
| +<br>- | Supplementary Fig. 3c Apool    | one-way ANOVA |  | Biological replicates Sac=5 Nic=5 Animal (Female) Nic = 12 Sac = 14 | 2 to 4 animals (Female) were pooled one biological replicate, animal randomly assigned to groups | Supplementary Fig.4 legend | 1.70 ± 0.17 | Supplementary source data spreadsheet | p=0.00306323 |  | F(1,8)=17.505  |  |
| +<br>- | Supplementary Fig. 3c Lipc     | one-way ANOVA |  | Biological replicates Sac=5 Nic=5 Animal (Female) Nic = 12 Sac = 14 | 2 to 4 animals (Female) were pooled one biological replicate, animal randomly assigned to groups | Supplementary Fig.4 legend | 2.44 ± 0.10 | Supplementary source data spreadsheet | p=0.00000862 |  | F(1,8)=99.602  |  |
| +<br>- | Supplementary Fig. 3c Cdk5rap  | one-way ANOVA |  | Biological replicates Sac=5 Nic=5 Animal (Female) Nic = 12 Sac = 14 | 2 to 4 animals (Female) were pooled one biological replicate, animal randomly assigned to groups | Supplementary Fig.4 legend | 4.06 ± 0.45 | Supplementary source data spreadsheet | p=0.00014572 |  | F(1,8)=45.502  |  |
| +<br>- | Supplementary Fig. 3c Ing4     | one-way ANOVA |  | Biological replicates Sac=5 Nic=5 Animal (Female) Nic = 12 Sac = 14 | 2 to 4 animals (Female) were pooled one biological replicate, animal randomly assigned to groups | Supplementary Fig.4 legend | 3.68 ± 0.10 | Supplementary source data spreadsheet | p=0.00000001 |  | F(1,8)=565.869 |  |
| +<br>- | Supplementary Fig. 3c Ank3     | one-way ANOVA |  | Biological replicates Sac=5 Nic=5 Animal (Female) Nic = 12 Sac = 14 | 2 to 4 animals (Female) were pooled one biological replicate, animal randomly assigned to groups | Supplementary Fig.4 legend | 2.97 ± 0.11 | Supplementary source data spreadsheet | p=0.00000452 |  | F(1,8)=118.256 |  |

|   |                              |               |  |                                                                     |                                                                                                  |                            |             |                                       |              |  |                |  |
|---|------------------------------|---------------|--|---------------------------------------------------------------------|--------------------------------------------------------------------------------------------------|----------------------------|-------------|---------------------------------------|--------------|--|----------------|--|
| + | Supplementary Fig. 3c Ntm    | one-way ANOVA |  | Biological replicates Sac=5 Nic=5 Animal (Female) Nic = 12 Sac = 14 | 2 to 4 animals (Female) were pooled one biological replicate, animal randomly assigned to groups | Supplementary Fig.4 legend | 1.67 ± 0.07 | Supplementary source data spreadsheet | p=0.00017324 |  | F(1,8)=43.276  |  |
| + | Supplementary Fig. 3c Zfp658 | one-way ANOVA |  | Biological replicates Sac=5 Nic=5 Animal (Female) Nic = 12 Sac = 14 | 2 to 4 animals (Female) were pooled one biological replicate, animal randomly assigned to groups | Supplementary Fig.4 legend | 2.66 ± 0.05 | Supplementary source data spreadsheet | p=0.00000002 |  | F(1,8)=487.52  |  |
| + | Supplementary Fig. 3c csda   | one-way ANOVA |  | Biological replicates Sac=5 Nic=5 Animal (Female) Nic = 12 Sac = 14 | 2 to 4 animals (Female) were pooled one biological replicate, animal randomly assigned to groups | Supplementary Fig.4 legend | 3.21 ± 0.62 | Supplementary source data spreadsheet | p=0.01810693 |  | F(1,8)=8.77    |  |
| + | Supplementary Fig. 3c Sorcs1 | one-way ANOVA |  | Biological replicates Sac=5 Nic=5 Animal (Female) Nic = 12 Sac = 14 | 2 to 4 animals (Female) were pooled one biological replicate, animal randomly assigned to groups | Supplementary Fig.4 legend | 3.41 ± 0.37 | Supplementary source data spreadsheet | p=0.00019884 |  | F(1,8)=41.57   |  |
| + | Supplementary Fig. 3c Lars2  | one-way ANOVA |  | Biological replicates Sac=5 Nic=5 Animal (Female) Nic = 12 Sac = 14 | 2 to 4 animals (Female) were pooled one biological replicate, animal randomly assigned to groups | Supplementary Fig.4 legend | 3.31 ± 0.18 | Supplementary source data spreadsheet | p=0.00000168 |  | F(1,8)=153.564 |  |
| + | Supplementary Fig. 3c Ank1   | one-way ANOVA |  | Biological replicates Sac=5 Nic=5 Animal (Female) Nic = 12 Sac = 14 | 2 to 4 animals (Female) were pooled one biological replicate, animal randomly assigned to groups | Supplementary Fig.4 legend | 3.04 ± 0.28 | Supplementary source data spreadsheet | p=0.00009898 |  | F(1,8)=50.843  |  |
| + | Supplementary Fig. 3c Acac b | one-way ANOVA |  | Biological replicates Sac=5 Nic=5 Animal (Female) Nic = 12 Sac = 14 | 2 to 4 animals (Female) were pooled one biological replicate, animal randomly assigned to groups | Supplementary Fig.4 legend | 3.40 ± 0.15 | Supplementary source data spreadsheet | p=0.00000029 |  | F(1,8)=242.093 |  |
| + | Supplementary Fig. 3c Mgd a2 | one-way ANOVA |  | Biological replicates Sac=5 Nic=5 Animal (Female) Nic = 12 Sac = 14 | 2 to 4 animals (Female) were pooled one biological replicate, animal randomly assigned to groups | Supplementary Fig.4 legend | 9.07 ± 0.54 | Supplementary source data spreadsheet | p=0.00000040 |  | F(1,8)=223.283 |  |

|        |                                 |               |  |                                                                     |                                                                                                  |                            |                |                                       |              |  |                |  |
|--------|---------------------------------|---------------|--|---------------------------------------------------------------------|--------------------------------------------------------------------------------------------------|----------------------------|----------------|---------------------------------------|--------------|--|----------------|--|
| +<br>- | Supplementary Fig. 3c Chl1      | one-way ANOVA |  | Biological replicates Sac=5 Nic=5 Animal (Female) Nic = 12 Sac = 14 | 2 to 4 animals (Female) were pooled one biological replicate, animal randomly assigned to groups | Supplementary Fig.4 legend | 3.90 ± 0.25    | Supplementary source data spreadsheet | p=0.00000592 |  | F(1,8)=110.084 |  |
| +<br>- | Supplementary Fig. 3c Auts 2    | one-way ANOVA |  | Biological replicates Sac=5 Nic=5 Animal (Female) Nic = 12 Sac = 14 | 2 to 4 animals (Female) were pooled one biological replicate, animal randomly assigned to groups | Supplementary Fig.4 legend | 1.81 ± 0.09    | Supplementary source data spreadsheet | p=0.00119824 |  | F(1,8)=23.981  |  |
| +<br>- | Supplementary Fig. 3c Mbml 1    | one-way ANOVA |  | Biological replicates Sac=5 Nic=5 Animal (Female) Nic = 12 Sac = 14 | 2 to 4 animals (Female) were pooled one biological replicate, animal randomly assigned to groups | Supplementary Fig.4 legend | 0.9546 ± 0.035 | Supplementary source data spreadsheet | p=0.50674655 |  | F(1,8)=0.483   |  |
| +<br>- | Supplementary Fig. 3c Cpeb 1    | one-way ANOVA |  | Biological replicates Sac=5 Nic=5 Animal (Female) Nic = 12 Sac = 14 | 2 to 4 animals (Female) were pooled one biological replicate, animal randomly assigned to groups | Supplementary Fig.4 legend | 1.22 ± 0.038   | Supplementary source data spreadsheet | p=0.01096747 |  | F(1,8)=10.846  |  |
| +<br>- | Supplementary Fig. 3c Zfp71-rs1 | one-way ANOVA |  | Biological replicates Sac=5 Nic=5 Animal (Female) Nic = 12 Sac = 14 | 2 to 4 animals (Female) were pooled one biological replicate, animal randomly assigned to groups | Supplementary Fig.4 legend | 1.82 ± 0.23    | Supplementary source data spreadsheet | p=0.00461852 |  | F(1,8)=15.121  |  |
| +<br>- | Supplementary Fig. 3c Chd9      | one-way ANOVA |  |                                                                     | 2 to 4 animals (Female) were pooled one biological replicate, animal randomly assigned to groups | Supplementary Fig.4 legend | 2.04 ± 0.11    | Supplementary source data spreadsheet | p=0.04089817 |  | F(1,8)=5.928   |  |
| +<br>- | Supplementary Fig. 3c Syt4      | one-way ANOVA |  | Biological replicates Sac=5 Nic=5 Animal (Female) Nic = 12 Sac = 14 | 2 to 4 animals (Female) were pooled one biological replicate, animal randomly assigned to groups | Supplementary Fig.4 legend | 3.51 ± 0.44    | Supplementary source data spreadsheet | p=0.00119008 |  | F(1,8)=24.034  |  |
| +<br>- | Supplementary Fig. 3c Sp110     | one-way ANOVA |  | Biological replicates Sac=5 Nic=5 Animal (Female) Nic = 12 Sac = 14 | 2 to 4 animals (Female) were pooled one biological replicate, animal randomly assigned to groups | Supplementary Fig.4 legend | 2.31 ± 0.48    | Supplementary source data spreadsheet | p=0.02322340 |  | F(1,8)=7.836   |  |



|        |                                  |                                                   |  |                                                                                                                                                      |                                                                                                   |                            |                                                                                                      |                                       |                                                                                                                                                                                              |  |                                |  |
|--------|----------------------------------|---------------------------------------------------|--|------------------------------------------------------------------------------------------------------------------------------------------------------|---------------------------------------------------------------------------------------------------|----------------------------|------------------------------------------------------------------------------------------------------|---------------------------------------|----------------------------------------------------------------------------------------------------------------------------------------------------------------------------------------------|--|--------------------------------|--|
| +<br>- | Supplementary Fig. 3c<br>Sors2   | one-way ANOVA                                     |  | Biological replicates<br>Sac=5<br>Nic=5<br>Animal (Female)<br>Nic = 12<br>Sac = 14                                                                   | 2 to 4 animals (Female) were pooled one biological replicate, animal randomly assigned to groups  | Supplementary Fig.4 legend | 2.07 ± 0.08                                                                                          | Supplementary source data spreadsheet | p=0.00009607                                                                                                                                                                                 |  | F(1,8)=51.276                  |  |
| +<br>- | Supplementary Fig. 3c<br>Slc35a2 | one-way ANOVA                                     |  | Biological replicates<br>Sac=5<br>Nic=5<br>Animal (Female)<br>Nic = 12<br>Sac = 14                                                                   | 2 to 4 animals (Female) were pooled one biological replicate, animal randomly assigned to groups  | Supplementary Fig.4 legend | 1.83 ± 0.16                                                                                          | Supplementary source data spreadsheet | p=0.00106755                                                                                                                                                                                 |  | F(1,8)=24.889                  |  |
| +<br>- | Supplementary Fig. 3c<br>Mef2c   | one-way ANOVA                                     |  | Biological replicates<br>Sac=5<br>Nic=5<br>Animal (Female)<br>Nic = 12<br>Sac = 14                                                                   | 2 to 4 animals (Female) were pooled one biological replicate, animal randomly assigned to groups  | Supplementary Fig.4 legend | 1.76 ± 0.11                                                                                          | Supplementary source data spreadsheet | p=0.00223843                                                                                                                                                                                 |  | F(1,8)=19.501                  |  |
| +<br>- | Supplementary Fig. 4a            | one-way ANOVA                                     |  | Biological replicates<br>Sac=5<br>Nic=5<br>Animal (Female)<br>Nic = 11<br>Sac = 15                                                                   | 2 or 3 animals (Female) were pooled one biological replicate, animals randomly assigned to groups | Supplementary Fig.4 legend | 1.67 ± 0.15                                                                                          | Supplementary source data spreadsheet | p=0.00232999                                                                                                                                                                                 |  | F(1,8)=19.237                  |  |
| +<br>- | Supplementary Fig. 4b            | one-way ANOVA                                     |  | Biological replicates<br>Sac=5<br>Nic=5<br>Animal (Female)<br>Nic = 12<br>Sac = 14                                                                   | 2 to 4 animals (Female) were pooled one biological replicate, animal randomly assigned to groups  | Supplementary Fig.4 legend | 2.11 ± 0.10                                                                                          | Supplementary source data spreadsheet | p=0.00000445                                                                                                                                                                                 |  | F(1,8)=118.802                 |  |
| +<br>- | Supplementary Fig. 4c            | one-way ANOVA<br>Tukey's multiple comparison test |  | Frontal;<br>Sac = 5<br>Nic = 5<br>Parietal;<br>Sac = 5<br>Nic = 5<br>Occipital;<br>Sac = 5<br>Nic = 5<br><br>Animal (Female)<br>Nic = 12<br>Sac = 14 | 2 to 4 animals (Female) were pooled one biological replicate, animal randomly assigned to groups  | Supplementary Fig.5 legend | Frontal nic;<br>2.98 ± 0.17<br><br>Parietal nic;<br>2.75 ± 0.58<br><br>Occipital nic;<br>2.37 ± 0.46 | Supplementary source data spreadsheet | main effect;<br>p=0.000021<br><br>Frontal sac vs<br>Frontal nic;<br>p=0.001277<br><br>Parietal sac vs<br>Parietal nic;<br>p=0.005846<br><br>Occipital sac vs<br>Occipital nic;<br>p=0.011952 |  | main effect;<br>F(5,24)=10.403 |  |

► Representative figures

1. Are any representative images shown (including Western blots and immunohistochemistry/staining) in the paper?

If so, what figure(s)?

Figure 1 c  
Figure 4 a, b, c, d  
Figure 5 a, c

2. For each representative image, is there a clear statement of how many times this experiment was successfully repeated and a discussion of any limitations in repeatability?

If so, where is this reported (section, paragraph #)?

Figure 1 c: confirmation of already observed result (Discussion paragraph 2)

Figure 4 a, b, c, d: experiment repeated 2 times with 4 replicates. Both experiments showed a similar pattern (Figure 4 legend). Supplementary figure 3 and 7

## ▶ Statistics and general methods

1. Is there a justification of the sample size?

If so, how was it justified?

Where (section, paragraph #)?

Even if no sample size calculation was performed, authors should report why the sample size is adequate to measure their effect size.

No statistical methods were used to predetermine sample sizes, but our sample sizes are similar to those reported in previous works.

Microarray and deep sequencing experiments were done on sample sizes based on successful experiments in the literature. All confirmation experiments were performed on multiple pools of brains to reduce biological variability with adequate power. Cell culture and slice experiments were performed as per previously published studies. In utero electroporation was performed on as many litters as possible to obtain viable pups, and was replicated to assure stability of the findings. Each method section states this.

2. Are statistical tests justified as appropriate for every figure?

Where (section, paragraph #)?

yes

Figure legends

- a. If there is a section summarizing the statistical methods in the methods, is the statistical test for each experiment clearly defined?

Although there is a section on Statistical Analysis in the Online Methods, there are too many statistical tests to be described in a single section, so the statistics are presented in the figure legends.

- b. Do the data meet the assumptions of the specific statistical test you chose (e.g. normality for a parametric test)?

Yes

This is described in the Online Methods: Statistical Analysis and Computational Analysis, page 34.

Where is this described (section, paragraph #)?

- c. Is there any estimate of variance within each group of data? Is the variance similar between groups that are being statistically compared?

Levene's test were conducted for homogeneity variance (now described in Methods: Statistical Analyses).

Where is this described (section, paragraph #)?

- d. Are tests specified as one- or two-sided?

yes

- e. Are there adjustments for multiple comparisons?

Yes. Bonferroni Corrections/Tukey's/LSD'S Hoc corrections for multiple comparisons.

3. Are criteria for excluding data points reported?

Was this criterion established prior to data collection?

Where is this described (section, paragraph #)?

No data points were excluded for these studies

4. Define the method of randomization used to assign subjects (or samples) to the experimental groups and to collect and process data.  
If no randomization was used, state so.  
Where does this appear (section, paragraph #)?
- N/A (all studies were performed on wild type C57BL6J mice or cultures from wild type mice.)
5. Is a statement of the extent to which investigator knew the group allocation during the experiment and in assessing outcome included?  
If no blinding was done, state so.  
Where (section, paragraph #)?
- For all morphological studies, after collection of brain samples, written information was masked with tape. We asked lab colleagues to assign random numbers to each sample tube. The blind was uncovered after experiments were completed.  
This is stated in the Online Methods on pages 27 and 28.  
Identity of In utero electroporated animals was revealed after behavioral study by examining sliced brain with fluorescence microscope. This is stated in the Online Methods on pages 35 and 36
6. For experiments in live vertebrates, is a statement of compliance with ethical guidelines/regulations included?  
Where (section, paragraph #)?
- Yes - all animal experiments were carried out in accordance with an approved IACUC protocol. This is stated in the Online Methods: Animal section.
7. Is the species of the animals used reported?  
Where (section, paragraph #)?
- Yes  
Online methods: Animal section
8. Is the strain of the animals (including background strains of KO/transgenic animals used) reported?  
Where (section, paragraph #)?
- Yes  
In Online Methods, Animal section
9. Is the sex of the animals/subjects used reported?  
Where (section, paragraph #)?
- Brains and neurons for cultures were obtained from litters and sex was not determined. Data come from pooled males and females. This is reported in the Online Methods, Animal section
10. Is the age of the animals/subjects reported?  
Where (section, paragraph #)?
- Yes  
Results. paragraph 1 and paragraph 3
11. For animals housed in a vivarium, is the light/dark cycle reported?  
Where (section, paragraph #)?
- Yes  
Online Methods, Animal section
12. For animals housed in a vivarium, is the housing group (i.e. number of animals per cage) reported?  
Where (section, paragraph #)?
- Yes  
Online Methods, Animal section
13. For behavioral experiments, is the time of day reported (e.g. light or dark cycle)?  
Where (section, paragraph #)?
- Yes. 12 h light/dark cycle; Online method on page 24
14. Is the previous history of the animals/subjects (e.g. prior drug administration, surgery, behavioral testing) reported?  
Where (section, paragraph #)?
- Yes. In utero electroporation surgery on E14day and nicotine and saccharin administered.  
Online Methods, developmental nicotine exposure on page 24

- a. If multiple behavioral tests were conducted in the same group of animals, is this reported?

N/A

Where (section, paragraph #)?

15. If any animals/subjects were excluded from analysis, is this reported?

No animals were excluded from analysis; No reported

Where (section, paragraph #)?

- a. How were the criteria for exclusion defined?

N/A

Where is this described (section, paragraph #)?

- b. Specify reasons for any discrepancy between the number of animals at the beginning and end of the study.

N/A

Where is this described (section, paragraph #)?

## ► Reagents

1. Have antibodies been validated for use in the system under study (assay and species)?

Yes, Ash2l and Mef2c antibodies are validated with shRNA and over expressed constructs of Ash2l and Mef2c.

Wdr5 and RbBP antibodies validation data were not reported in the manuscript. The citations listed below are validation of the antibodies used in both Western.

Anti-Wdr5 antibody (abcam, ab56919)

Ullius A et al. Nucleic Acids Res N/A:N/A (2014).

Mungamuri SK et al. Cell Rep 5:302-13 (2013).

Anti-RbBP5 (abcam, ab52084)

Benedikt A et al. Leukemia 25:135-44 (2011).

Anti-beta tubulin (abcam, ab6046)

Liu L et al. Cell Microbiol 17:595-605 (2015).

Anti-Gapdh antibody (sigma, G8795-200UL)

Zheng, L., et al., Cell, 114, 255-266 (2003)

- a. Is antibody catalog number given?

Yes

Where does this appear (section, paragraph #)?

Online Methods, p24, p29

- b. Where were the validation data reported (citation, supplementary information, Antibodypedia)?

Citations

Where does this appear (section, paragraph #)?

2. If cell lines were used to reflect the properties of a particular tissue or disease state, is their source identified?

N/A

Where (section, paragraph #)?

- a. Were they recently authenticated?

N/A

Where is this information reported (section, paragraph #)?

## ▶ Data deposition

Data deposition in a public repository is mandatory for:

- Protein, DNA and RNA sequences
- Macromolecular structures
- Crystallographic data for small molecules
- Microarray data

Deposition is strongly recommended for many other datasets for which structured public repositories exist; more details on our data policy are available [here](#). We encourage the provision of other source data in supplementary information or in unstructured repositories such as [Figshare](#) and [Dryad](#).

We encourage publication of Data Descriptors (see [Scientific Data](#)) to maximize data reuse.

- Are accession codes for deposit dates provided?

Where (section, paragraph #)?

Microarray data are in the process of being deposited to GEO and ChIP sequencing data are being submitted to NCBI. We do not yet have accession numbers, but will add these should the manuscript be accepted.

## ▶ Computer code/software

Any custom algorithm/software that is central to the methods must be supplied by the authors in a usable and readable form for readers at the time of publication. However, referees may ask for this information at any time during the review process.

- Identify all custom software or scripts that were required to conduct the study and where in the procedures each was used.

N/A

- If computer code was used to generate results that are central to the paper's conclusions, include a statement in the Methods section under "**Code availability**" to indicate whether and how the code can be accessed. Include version information as necessary and any restrictions on availability.

N/A

## ▶ Human subjects

- Which IRB approved the protocol?

Where is this stated (section, paragraph #)?

N/A

- Is demographic information on all subjects provided?

Where (section, paragraph #)?

N/A

- Is the number of human subjects, their age and sex clearly defined?

Where (section, paragraph #)?

N/A

- Are the inclusion and exclusion criteria (if any) clearly specified?

Where (section, paragraph #)?

N/A

5. How well were the groups matched?  
Where is this information described (section, paragraph #)?
- N/A
6. Is a statement included confirming that informed consent was obtained from all subjects?  
Where (section, paragraph #)?
- N/A
7. For publication of patient photos, is a statement included confirming that consent to publish was obtained?  
Where (section, paragraph #)?
- N/A

## ► fMRI studies

For papers reporting functional imaging (fMRI) results please ensure that these minimal reporting guidelines are met and that all this information is clearly provided in the methods:

1. Were any subjects scanned but then rejected for the analysis after the data was collected?
- N/A
- a. If yes, is the number rejected and reasons for rejection described?  
Where (section, paragraph #)?
- N/A
2. Is the number of blocks, trials or experimental units per session and/or subjects specified?  
Where (section, paragraph #)?
- N/A
3. Is the length of each trial and interval between trials specified?
- N/A
4. Is a blocked, event-related, or mixed design being used? If applicable, please specify the block length or how the event-related or mixed design was optimized.
- N/A
5. Is the task design clearly described?  
Where (section, paragraph #)?
- N/A
6. How was behavioral performance measured?
- N/A
7. Is an ANOVA or factorial design being used?
- N/A
8. For data acquisition, is a whole brain scan used?  
If not, state area of acquisition.
- N/A
- a. How was this region determined?
- N/A

9. Is the field strength (in Tesla) of the MRI system stated?
- a. Is the pulse sequence type (gradient/spin echo, EPI/spiral) stated?
- b. Are the field-of-view, matrix size, slice thickness, and TE/TR/flip angle clearly stated?
10. Are the software and specific parameters (model/functions, smoothing kernel size if applicable, etc.) used for data processing and pre-processing clearly stated?
11. Is the coordinate space for the anatomical/functional imaging data clearly defined as subject/native space or standardized stereotaxic space, e.g., original Talairach, MNI305, ICBM152, etc? Where (section, paragraph #)?
12. If there was data normalization/standardization to a specific space template, are the type of transformation (linear vs. nonlinear) used and image types being transformed clearly described? Where (section, paragraph #)?
13. How were anatomical locations determined, e.g., via an automated labeling algorithm (AAL), standardized coordinate database (Talairach daemon), probabilistic atlases, etc.?
14. Were any additional regressors (behavioral covariates, motion etc) used?
15. Is the contrast construction clearly defined?
16. Is a mixed/random effects or fixed inference used?
- a. If fixed effects inference used, is this justified?
17. Were repeated measures used (multiple measurements per subject)?
- a. If so, are the method to account for within subject correlation and the assumptions made about variance clearly stated?
18. If the threshold used for inference and visualization in figures varies, is this clearly stated?
19. Are statistical inferences corrected for multiple comparisons?
- a. If not, is this labeled as uncorrected?

20. Are the results based on an ROI (region of interest) analysis?

N/A

a. If so, is the rationale clearly described?

N/A

b. How were the ROI's defined (functional vs anatomical localization)?

N/A

21. Is there correction for multiple comparisons within each voxel?

N/A

22. For cluster-wise significance, is the cluster-defining threshold and the corrected significance level defined?

N/A

## ► Additional comments

---

Additional Comments
